# Supplementary material for: Near-infrared absorbing aza-BODIPYs with 1,7-di-tert-butyl groups by low-barrier rotation for photothermal application
Source: Royal Society of Chemistry journal article supplement (doi:10.1039/d1ma01052b), 2021-11-30
Supplement: d1ma01052b1.pdf [file d1ma01052b1.pdf]

**Near-infrared absorbing aza-BODIPYs with the 1,7-di-*tert*-butyl groups  
by low-barrier rotation for a photothermal application†**

Sicheng Li<sup>a, ‡</sup>, Meiheng Lv<sup>a,c, ‡</sup>, Jie Wang<sup>b, ‡</sup>, Dongxiang Zhang<sup>a, ‡</sup>, Zhangrun  
Xu<sup>b</sup>, Xin-Dong Jiang<sup>a\*</sup>

**1. Synthesis**

**2. NMR**

**3. HRMS**

**4. Figure S1-S10, Table S1-S2**

**5. X-ray analysis**

## 1. Synthesis

### Synthesis of (E)-1-([1,1'-biphenyl]-4-yl)-4,4-dimethylpent-2-en-1-one

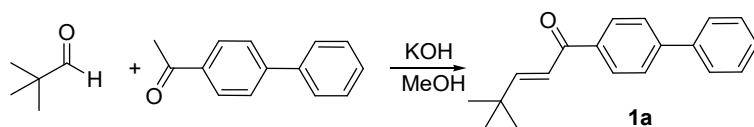

2g of KOH was added to 1-([1,1'-biphenyl]-4-yl)ethan-1-one (1.0 g, 5.1 mmol) and pivalaldehyde (1.5 ml, 17.4 mmol) in anhydrous methanol (20 ml), and then the mixture was refluxed for 12 h. The solvent was removed under reduced pressure, and the resulting crude mixture was separated by column chromatography (*n*-hexane : CH<sub>2</sub>Cl<sub>2</sub> = 1:1) to afford **1a** (1.21g, 90%) as white powder. <sup>1</sup>H NMR (400 MHz, CDCl<sub>3</sub>): 8.01 (d, <sup>3</sup>J = 8.0 Hz, 2H), 7.69 (d, <sup>3</sup>J = 8.0 Hz, 2H), 7.64 (d, <sup>3</sup>J = 8.0 Hz, 2H), 7.47 (t, <sup>3</sup>J = 8.0 Hz, 2H), 7.41 (t, <sup>3</sup>J = 8.0 Hz, 1H), 7.10 (d, <sup>3</sup>J = 16.0 Hz, 1H), 6.83 (d, <sup>3</sup>J = 16.0 Hz, 1H), 1.18 (s, 9H). <sup>13</sup>C NMR (125 MHz, CDCl<sub>3</sub>): δ (ppm) 190.8, 159.3, 145.1, 139.8, 136.7, 128.9, 128.7, 127.9, 127.1, 126.9, 120.7, 34.0, 28.6.

### Synthesis of 1-([1,1'-biphenyl]-4-yl)-4,4-dimethyl-3-(nitromethyl)pentan-1-one

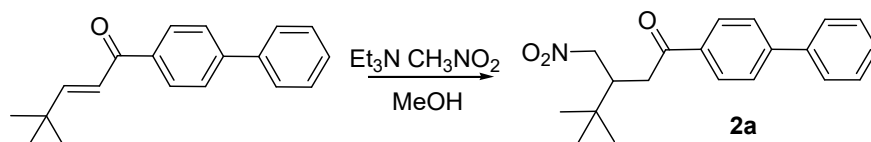

Triethylamine (2 ml) and nitromethane (1.5 ml) were added to (E)-1-([1,1'-biphenyl]-4-yl)-4,4-dimethylpent-2-en-1-one (1.21g, 4.6 mmol) in anhydrous methanol (20 ml). The mixture was refluxed for 24 h. The solvent was removed under reduced pressure, and resulting crude mixture was separated by column chromatography (*n*-hexane : CH<sub>2</sub>Cl<sub>2</sub> = 1:1) to afford **2a** (1.04 ml, 70%) as light yellow oil.

### Synthesis of DPh-tBuazaBDP

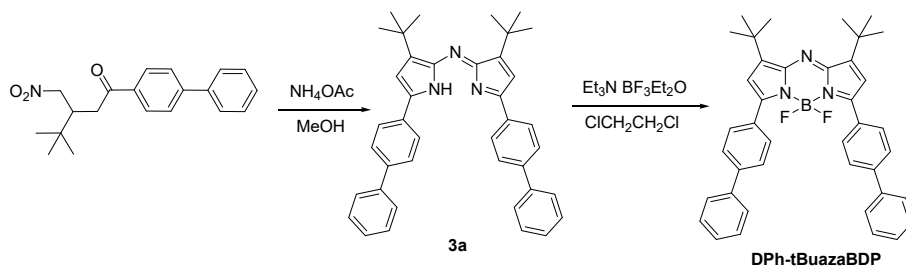

Ammonium acetate was added to **2a** (1.04ml, 3.2mmol) in anhydrous methanol (20 ml) and refluxed for 24 h. The solvent was removed under reduced pressure, and the resulting crude mixture was subjected to column chromatography (*n*-hexane: CH<sub>2</sub>Cl<sub>2</sub> = 3:1) to obtain **3a** (0.9 g, 55%) as a blue solid. After then, under N<sub>2</sub> triethylamine (0.5 ml, 3.6 mmol) was added to **3a** in 1,2-dichloroethane (10 ml), and stirred for 15 minutes. BF<sub>3</sub>·Et<sub>2</sub>O (1 ml, 7.9 mmol) was subsequently dropped into the solution, and the mixture was stirred for 4 hour at 80 °C. the organic layer was washed with water, brine and dried over Na<sub>2</sub>SO<sub>4</sub>. The solvent was removed under reduced pressure, and the residue was purified by silica gel column chromatography (*n*-hexane: CH<sub>2</sub>Cl<sub>2</sub> = 3:1), and then recrystallized from CH<sub>2</sub>Cl<sub>2</sub>/*n*-hexane to obtain **DPh-tBuazaBDP** (0.54 g, 50%) as green solid. <sup>1</sup>H NMR (500 MHz, CDCl<sub>3</sub>): δ (ppm) 8.09 (d, <sup>3</sup>*J* = 8.5 Hz, 4H), 7.68 (d, <sup>3</sup>*J* = 8.5 Hz, 4H), 7.64 (d, <sup>3</sup>*J* = 8.5 Hz, 4H), 7.45 (t, <sup>3</sup>*J* = 8.5 Hz, 4H), 7.37 (d, <sup>3</sup>*J* = 8.5 Hz, 4H), 6.66 (s, 2H), 1.51 (s, 18H). <sup>13</sup>C NMR (125 MHz, CDCl<sub>3</sub>): δ (ppm) 157.7, 144.1, 143.2, 140.3, 130.7, 130.2, 128.9, 128.0, 127.3, 124.5, 123.6, 119.5, 31.1, 29.8. HRMS (ESI) *m/z* calcd for C<sub>40</sub>H<sub>38</sub>BF<sub>2</sub>N<sub>3</sub>Na<sup>+</sup> (M+Na)<sup>+</sup> 632.30191, found 632.30200.

*Synthesis of (E)-1-(9H-fluoren-2-yl)-4,4-dimethylpent-2-en-1-one*

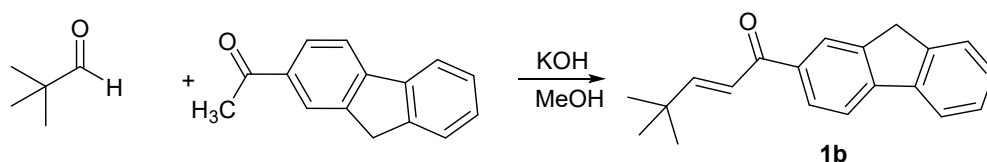

2g of KOH was added to Acetyl fluoride (1g, 4.8mmol) and pivalaldehyde(1.5ml 17.4mmol) in anhydrous methanol (20ml). The mixture was refluxed at 90°C for 12h. The solvent was removed under reduced pressure, The resulting crude mixture was separated by column chromatography (*n*-hexane:CH<sub>2</sub>Cl<sub>2</sub>=1:1) to afford **1b** (1.13g, 85%) in white powder form. <sup>1</sup>H NMR (400 MHz, CDCl<sub>3</sub>): δ (ppm) 8.13 (s, 1H), 7.99 (d, <sup>3</sup>*J* = 8 Hz, 1H), 7.85 (d, <sup>3</sup>*J* = 8 Hz, 2H), 7.59 (d, <sup>3</sup>*J* = 8 Hz, 1H), 7.35-7.44 (m, 2H), 7.11 (d, <sup>3</sup>*J* = 16 Hz, 1H), 6.87 (d, <sup>3</sup>*J* = 16 Hz, 1H), 3.97 (s, 2H), 1.18 (s, 9H). <sup>13</sup>C NMR (125 MHz, CDCl<sub>3</sub>): δ (ppm) 191.3, 159.2, 146.1, 144.6, 143.4, 140.7, 136.8,

128.1, 127.1, 125.4, 125.3, 121.1, 120.9, 119.7, 37.1, 34.3, 28.9.

*Synthesis of 1-(9H-fluoren-2-yl)-4,4-dimethyl-3-(nitromethyl)pentan-1-one*

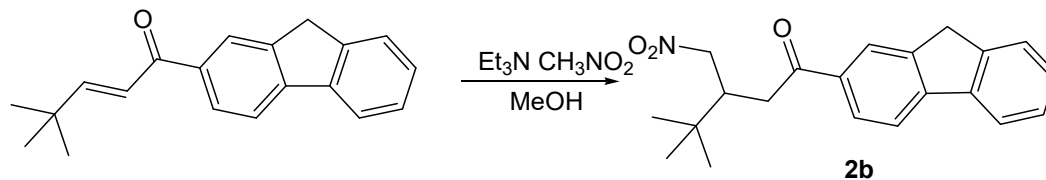

1-(9H-fluoren-2-yl)-4,4-dimethyl-3-(nitromethyl)pentan-1-one (1.13g, 4.1 mmol), triethylamine (2.5 ml) and nitromethane (2 ml) were added in anhydrous methanol (20 ml). The mixture was refluxed at 130°C for 24 h. The solvent was removed under reduced pressure and resulting crude mixture was separated by column chromatography (*n*-hexane : CH<sub>2</sub>Cl<sub>2</sub> = 1:1) to afford **2b** (0.90 g, 65%) as light yellow oil.

*Synthesis of Flu-tBuazaBDP*

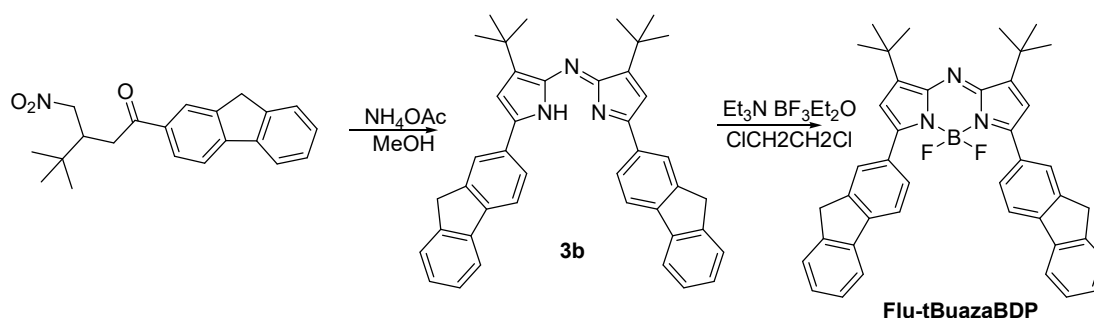

Ammonium acetate was added to the **3b** (0.90 g, 2.7 mmol) anhydrous methanol (20 ml) mixture suspension, refluxed at 130°C for 24 h, and the solvent was removed under reduced pressure. The resulting crude mixture was subjected to column chromatography (*n*-hexane: CH<sub>2</sub>Cl<sub>2</sub> = 2:1) to obtain **3b** (0.78 g, 50%) as a blue solid. Under N<sub>2</sub>, dissolve **3b** in 10 ml 1,2-dichloroethane, add triethylamine (0.5 ml, 3.6 mmol), stir for 15 minutes, slowly drop BF<sub>3</sub>Et<sub>2</sub>O (1 ml, 7.9 mmol) into the solution, 80°C. After reacting for 4 h, the organic layer was washed with water, brine and dried over Na<sub>2</sub>SO<sub>4</sub>. The solvent was removed under reduced pressure, and the residue was purified by silica gel column chromatography (*n*-hexane: CH<sub>2</sub>Cl<sub>2</sub> = 3:1), and then recrystallized from CH<sub>2</sub>Cl<sub>2</sub>/*n*-hexane to obtain **Flu-tBuazaBDP** (0.38 g, 45%) as a

green powder.  $^1\text{H}$  NMR (500 MHz,  $\text{CDCl}_3$ ):  $\delta$  (ppm) 8.05 (d,  $^3J = 8.0$  Hz, 2H), 7.84 (d,  $^3J = 8.0$  Hz, 2H), 7.81 (d,  $^3J = 8.0$  Hz, 2H), 7.55 (d,  $^3J = 8.0$  Hz, 2H), 7.38 8.05 (d,  $^3J = 8.0$  Hz, 2H), 7.35 (s, 2H), 7.33 (d,  $^3J = 8.0$  Hz, 2H), 6.67 (s, 2H), 3.95 (s, 4H), 1.52 (s, 18H).  $^{13}\text{C}$  NMR (125 MHz,  $\text{CDCl}_3$ ):  $\delta$  (ppm) 158.2, 156.5, 144.3, 143.4, 141.1, 130.4, 128.9, 127.6, 127.1, 126.2, 125.2, 124.5, 123.6, 120.6, 120.1, 119.7, 37.1, 31.1, 29.8. HRMS (ESI)  $m/z$  calcd for  $\text{C}_{42}\text{H}_{38}\text{BF}_2\text{N}_3\text{Na}^+$  ( $\text{M}+\text{Na}$ ) $^+$  656.30191, found 656.30182.

*Synthesis of (E)-4,4-dimethyl-1-(4-(methylthio)phenyl)pent-2-en-1-one*

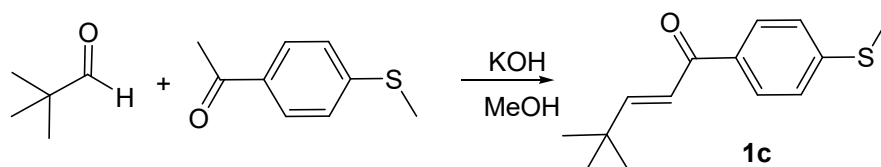

2g of KOH was added to 1-(4-(methylthio)phenyl)ethan-1-one (1 g, 6.0 mmol) and pivalaldehyde (1.5 ml, 17.4 mmol) in anhydrous methanol (20 ml). The mixture was refluxed at  $90^\circ\text{C}$  for 12 h. The solvent was removed under reduced pressure. The resulting crude mixture was separated by column chromatography (*n*-hexane:  $\text{CH}_2\text{Cl}_2 = 1:1$ ) to afford **1c** (1.13 g, 80%) as light yellow oil.  $^1\text{H}$  NMR (400 MHz,  $\text{CDCl}_3$ ):  $\delta$  (ppm) 7.86 (d,  $^3J = 8$  Hz, 2H), 7.28 (d,  $^3J = 8$  Hz, 2H), 7.05 (d,  $^3J = 16$  Hz, 1H), 6.75 (d,  $^3J = 16$  Hz, 1H), 2.52 (s, 2H), 1.15 (s, 9H).  $^{13}\text{C}$  NMR (125 MHz,  $\text{CDCl}_3$ ):  $\delta$  (ppm) 190.4, 159.3, 145.3, 134.6, 129.1, 125.2, 120.7, 34.3, 28.9, 15.0.

*Synthesis of (E)-4,4-dimethyl-1-(4-(methylthio)phenyl)-3-(nitromethyl)pentan-1-one*

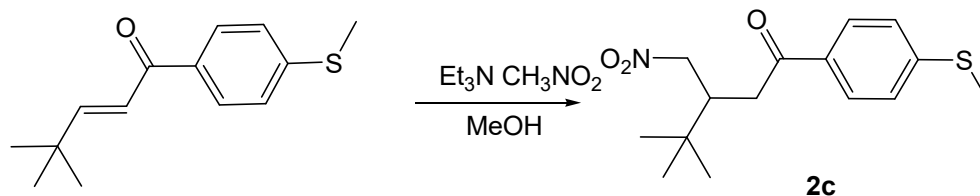

(E)-4,4-dimethyl-1-(4-(methylthio)phenyl)pent-2-en-1-one (1.13g, 4.8 mmol), triethylamine (2.5 ml) and nitromethane (2 ml) were added in anhydrous methanol (20 ml). The mixture was refluxed at  $130^\circ\text{C}$  for 24 h. The solvent was removed under reduced pressure and resulting crude mixture was separated by

column chromatography (*n*-hexane: CH<sub>2</sub>Cl<sub>2</sub> =1:1) to afford **2c** (0.79 ml, 55%) as light yellow oil.

### Synthesis of *S*-**tBuazaBDP**

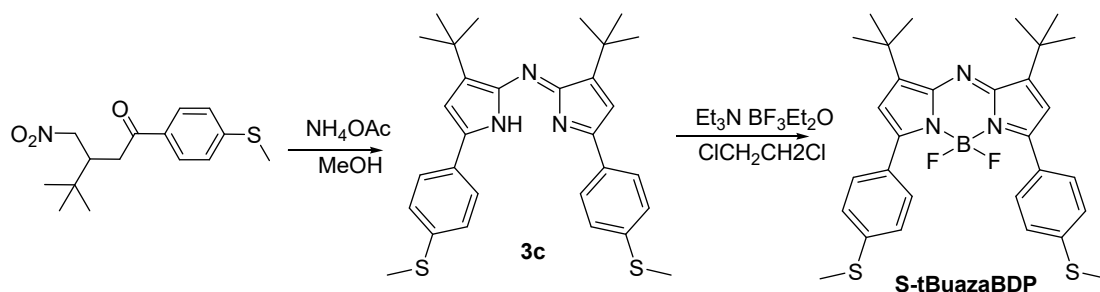

Ammonium acetate was added to **2c** (0.79 ml, 2.6 mmol) anhydrous methanol (20 ml) mixture suspension, refluxed at 130 °C for 24 h, and the solvent was removed under reduced pressure. The resulting crude mixture was subjected to column chromatography (*n*-hexane: CH<sub>2</sub>Cl<sub>2</sub> = 4:1) to obtain **3c** (0.53 g, 40%) as a blue solid. Under N<sub>2</sub>, dissolve **3c** (0.53 g, 1.1 mmol) in 10 ml 1,2-dichloroethane, add triethylamine (0.5 ml, 3.6 mmol), stir for 15 minutes, slowly drop BF<sub>3</sub> Et<sub>2</sub>O (1 ml 7.9 mmol) into the solution, 80 °C After reacting for 4 h, the organic layer was washed with water, brine and dried over Na<sub>2</sub>SO<sub>4</sub>. The solvent was removed under reduced pressure, and the residue was purified by silica gel column chromatography (*n*-hexane: CH<sub>2</sub>Cl<sub>2</sub> = 3:1), and then recrystallized from CH<sub>2</sub>Cl<sub>2</sub>/*n*-hexane to obtain *S*-**tBuazaBDP** (0.20 g, 35%) as a green powder. <sup>1</sup>H NMR (500 MHz, CDCl<sub>3</sub>): δ (ppm) 7.93 (d, <sup>3</sup>J = 8.5 Hz, 4H), 7.27 (d, <sup>3</sup>J = 8.5 Hz, 4H), 6.58 (s, 2H), 2.52 (s, 6H), 1.48 (s, 18H). <sup>13</sup>C NMR (125 MHz, CDCl<sub>3</sub>): δ (ppm) 157.1, 142.8, 131.0, 129.9, 128.9, 125.5, 124.5, 119.1, 53.5, 31.1, 29.8. HRMS (ESI) *m/z* calcd for C<sub>30</sub>H<sub>34</sub>BF<sub>2</sub>N<sub>3</sub>S<sub>2</sub>Na<sup>+</sup> (M+Na)<sup>+</sup> 572.21475, found 572.21497.

## 2. NMR

LSC-ph-1.10.fid  
1H NMR LSC-ph-1 in CDCl3

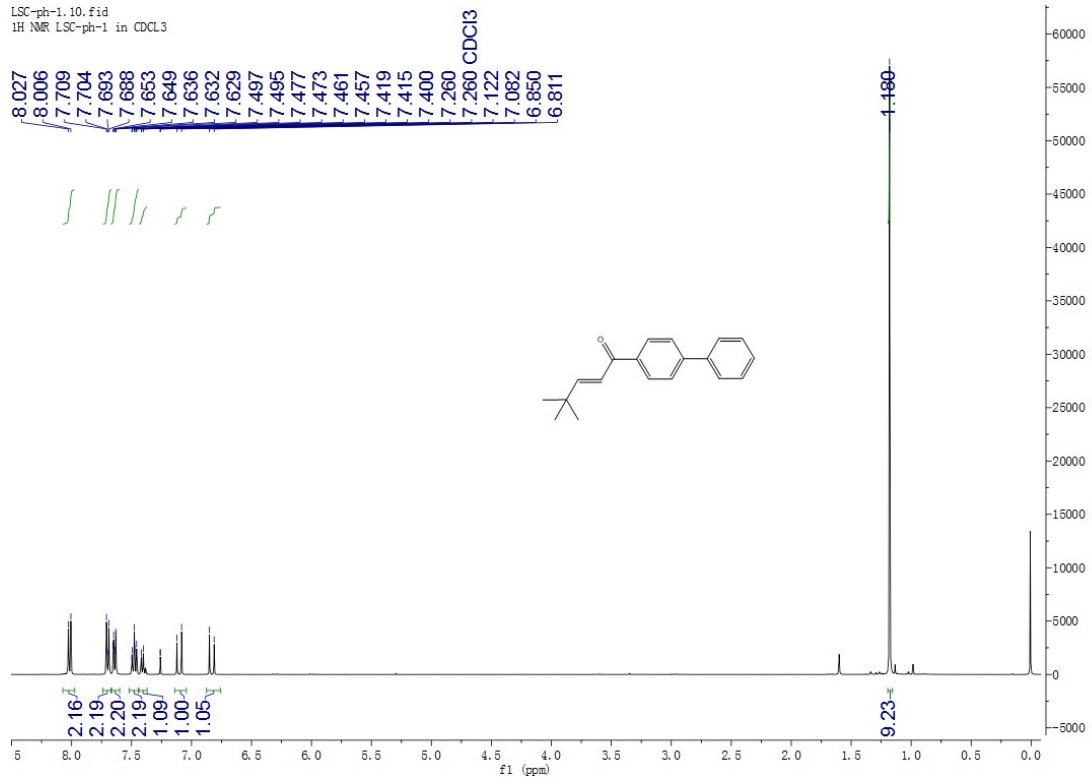

LSC-ph-1.20.fid  
13C NMR LSC-ph-1 in CDCl3

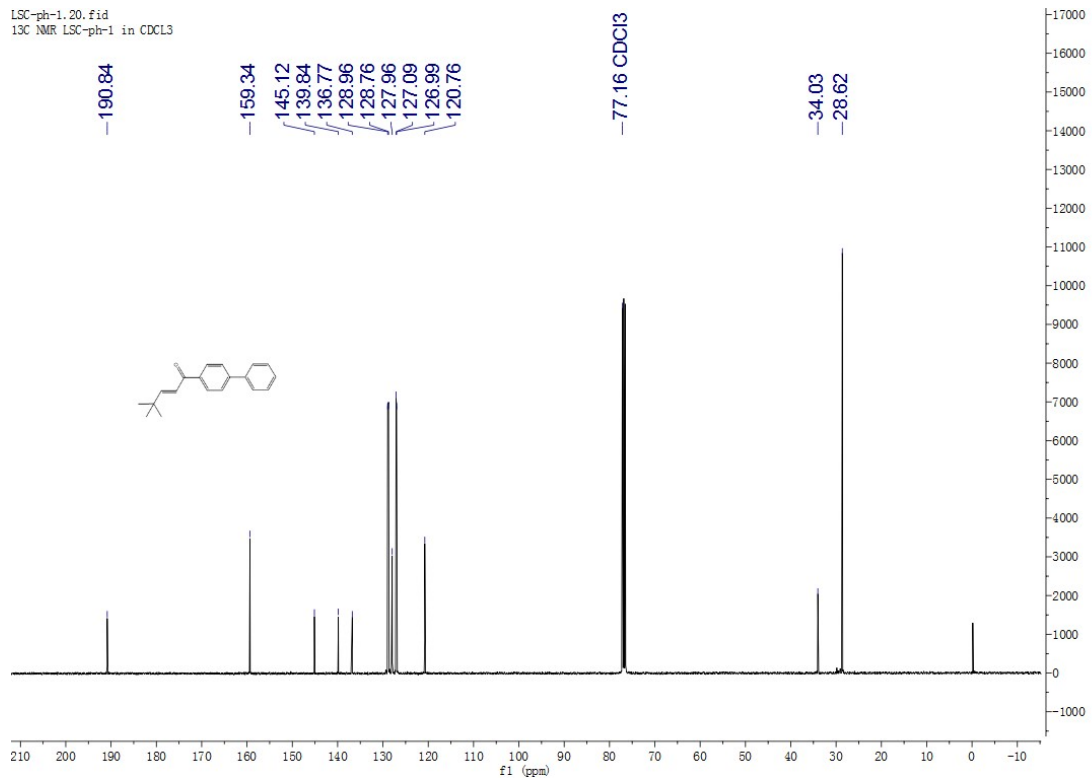

LSC-uu-1.10.fid  
1H NMR LSC-uu-1 in CDCl3

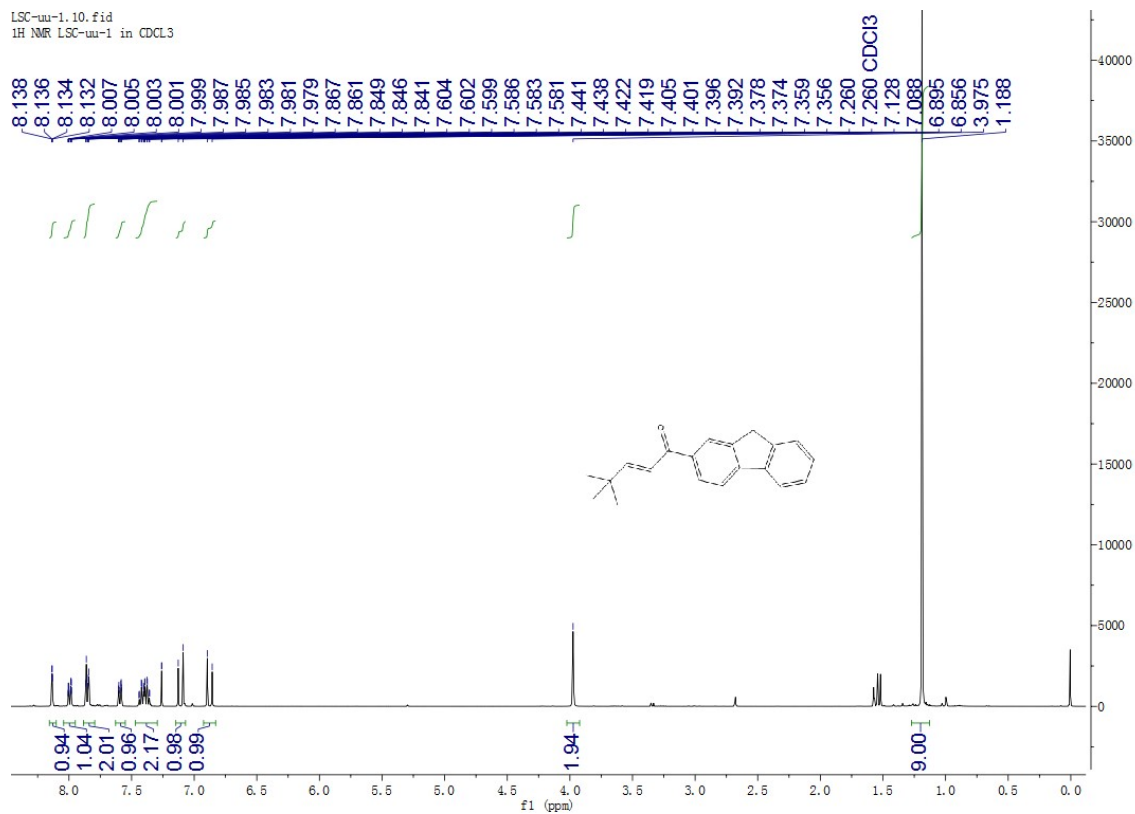

LSC-uu-1.20.fid  
13C NMR LSC-uu-1 in CDCl3

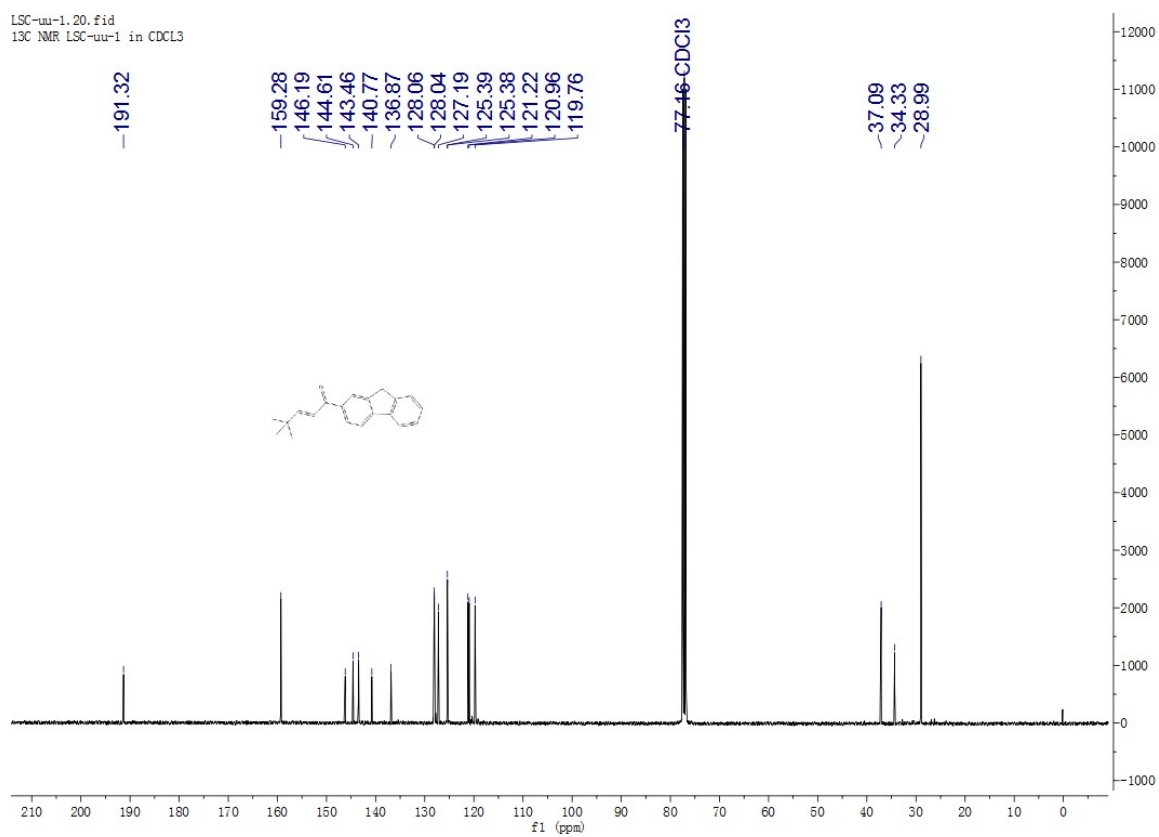



LSC-S-1.10.fid  
1H NMR LSC-S-1 in CDCL3

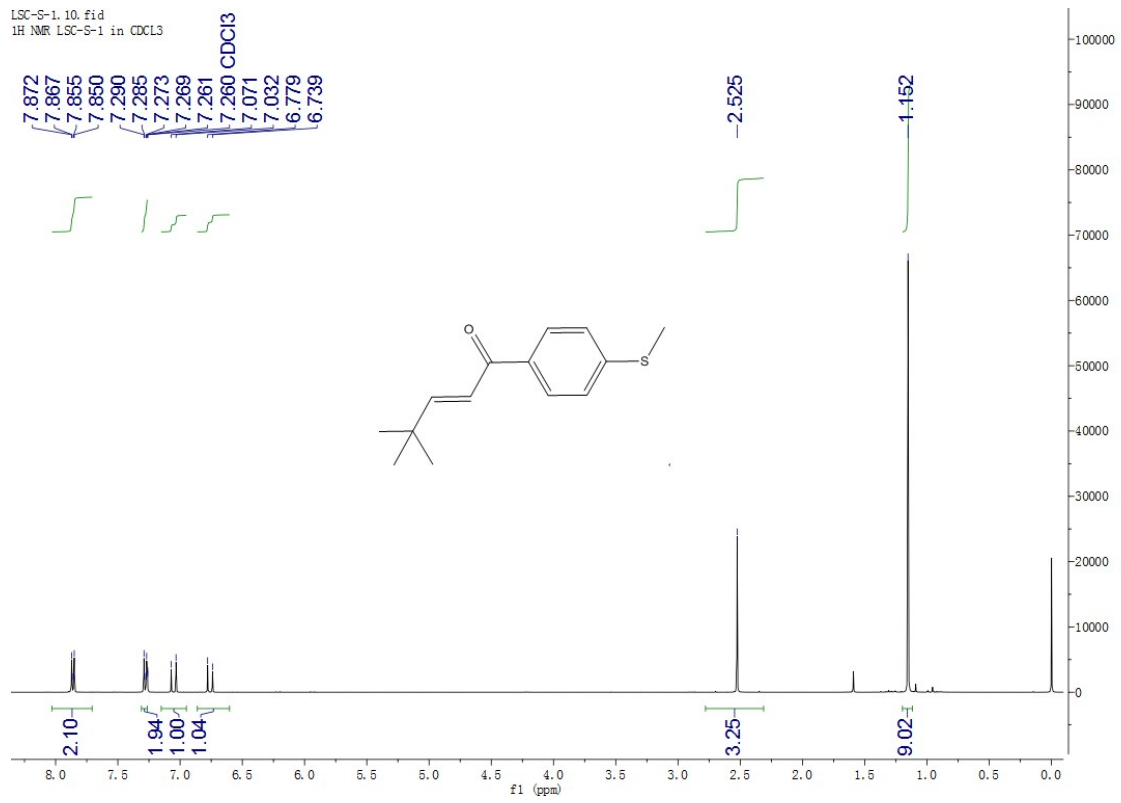

LSC-S-1.20.fid  
13C NMR LSC-S-1 in CDCL3

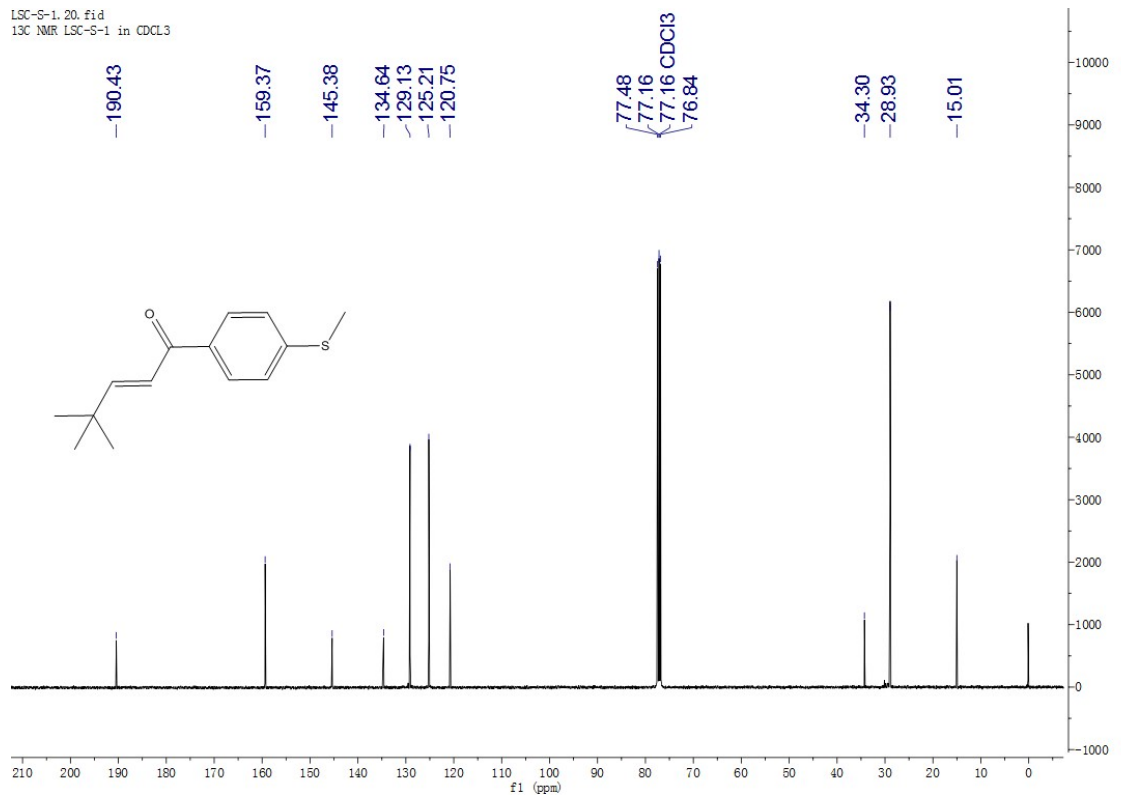

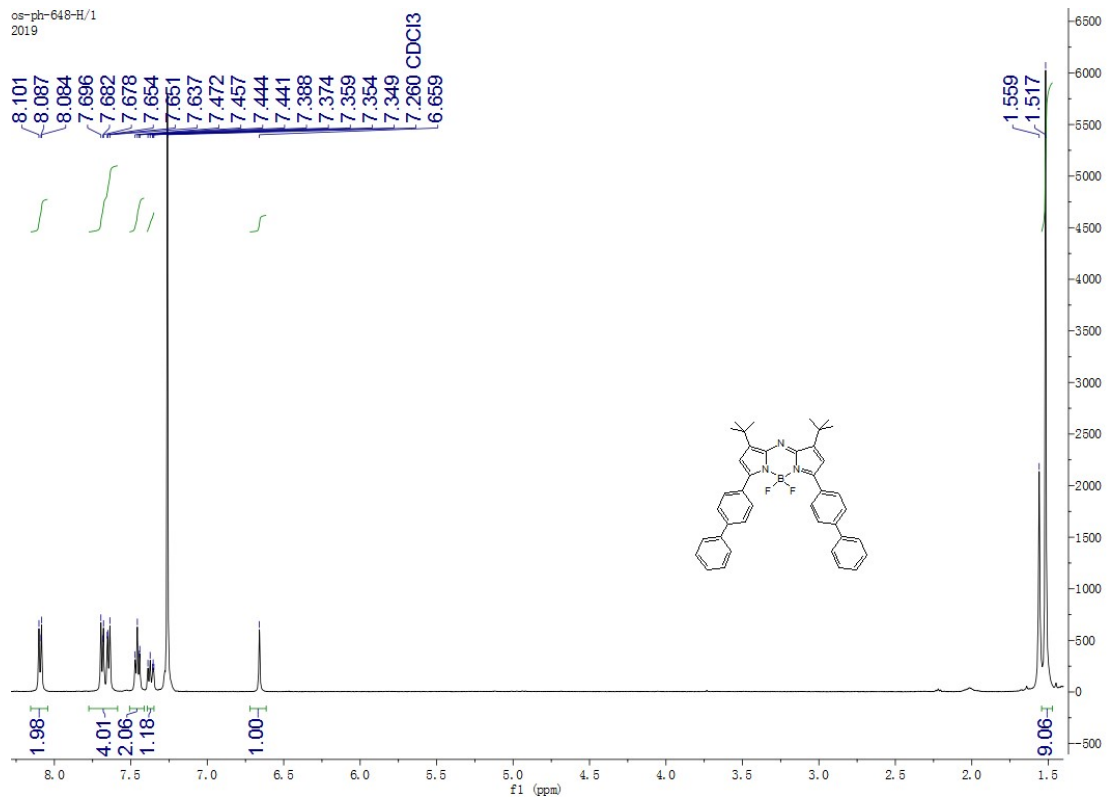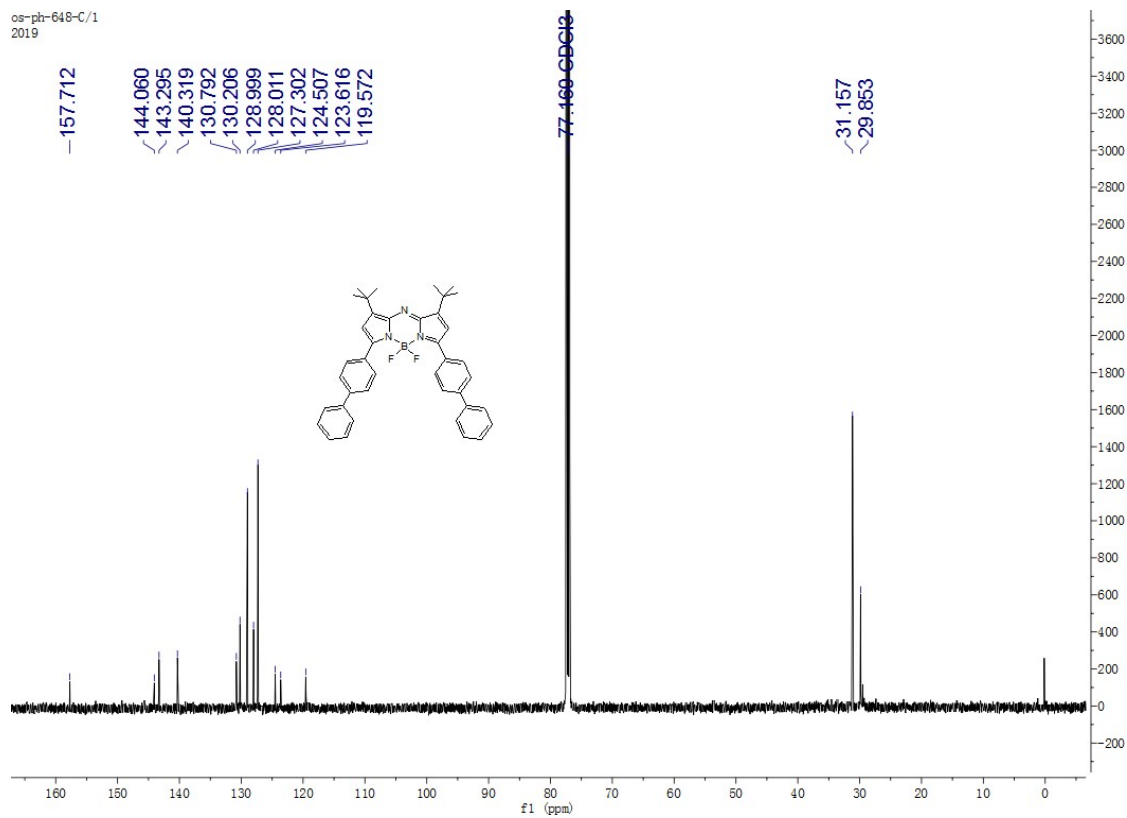

os-wu-668-H/1  
2019

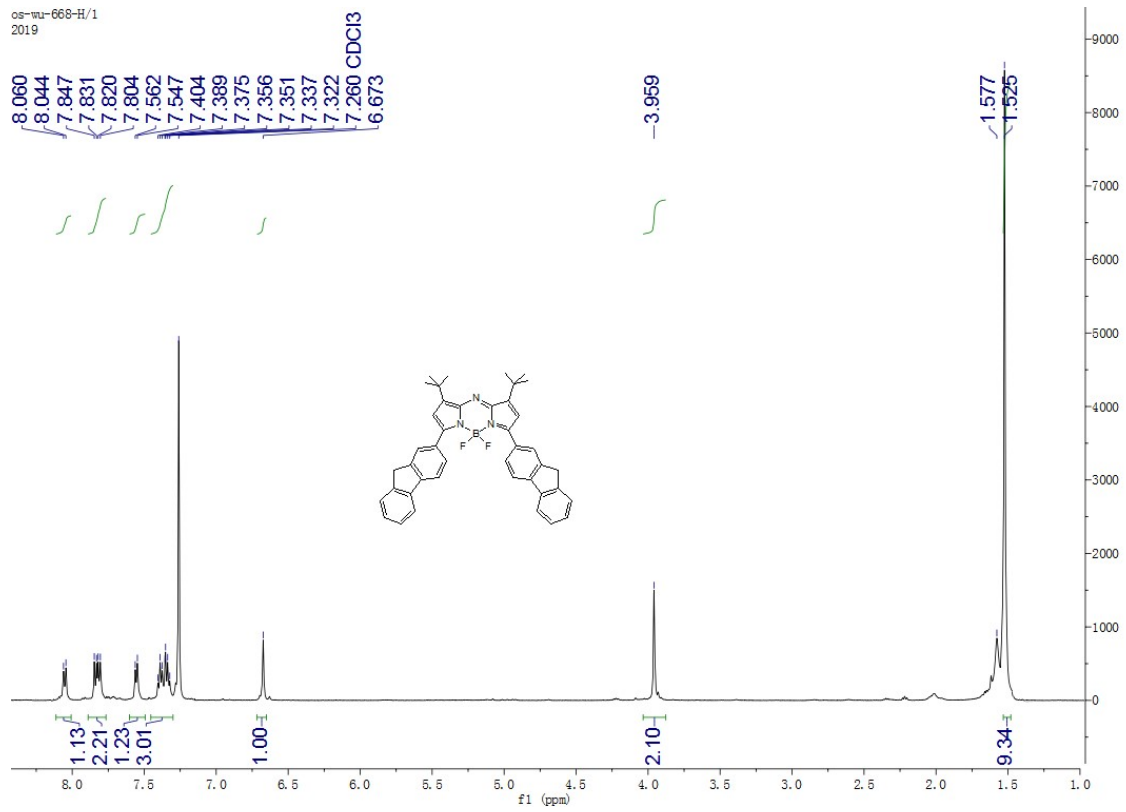

os-wu-668-C/1  
2019

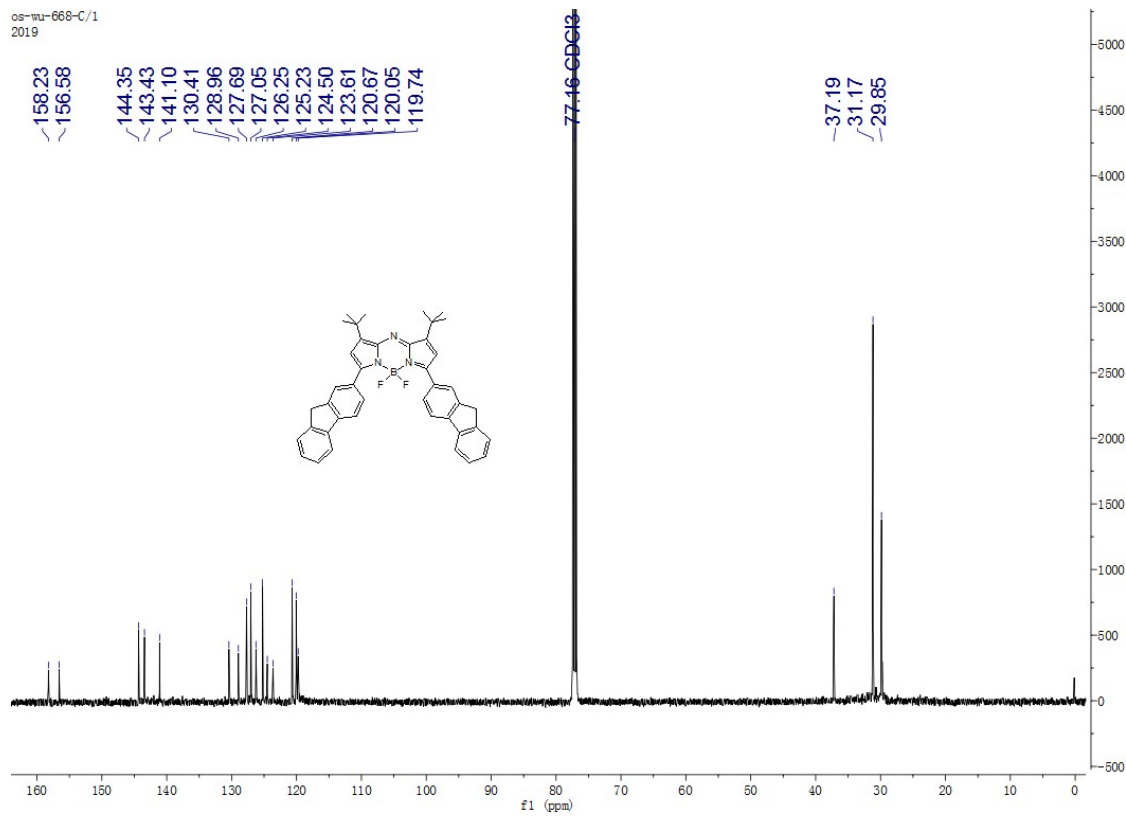

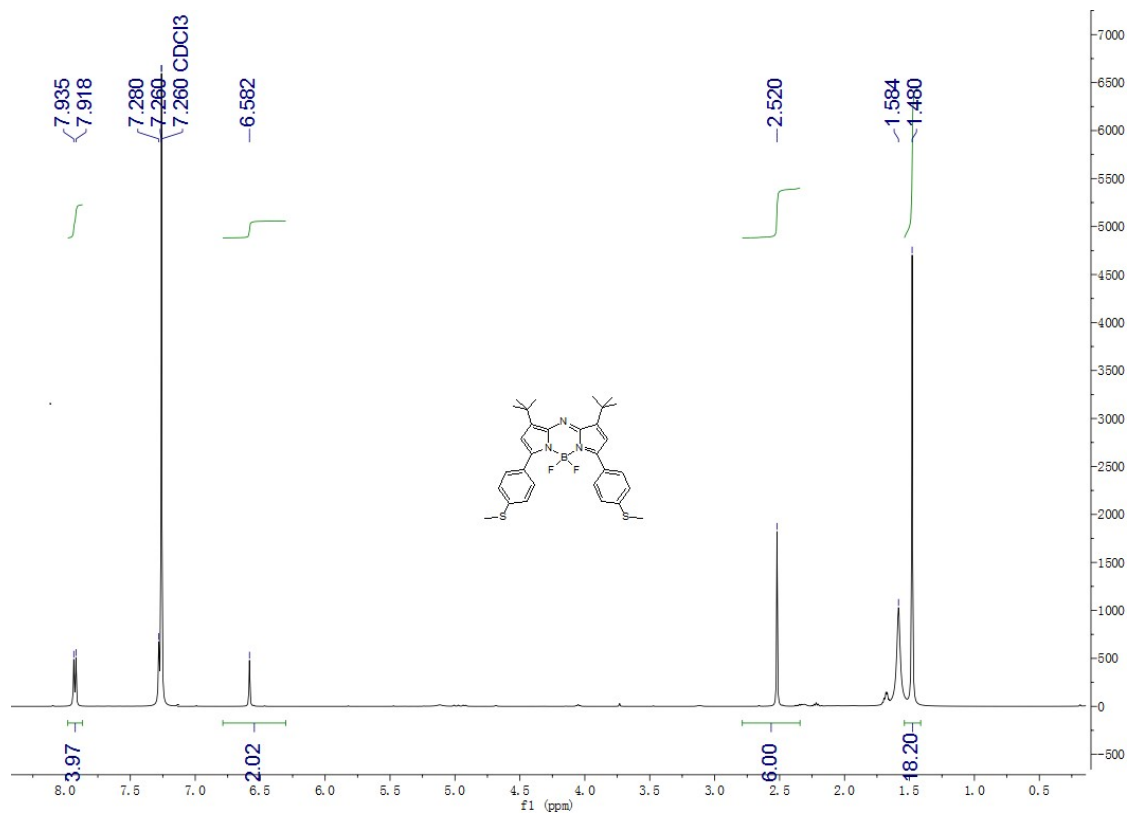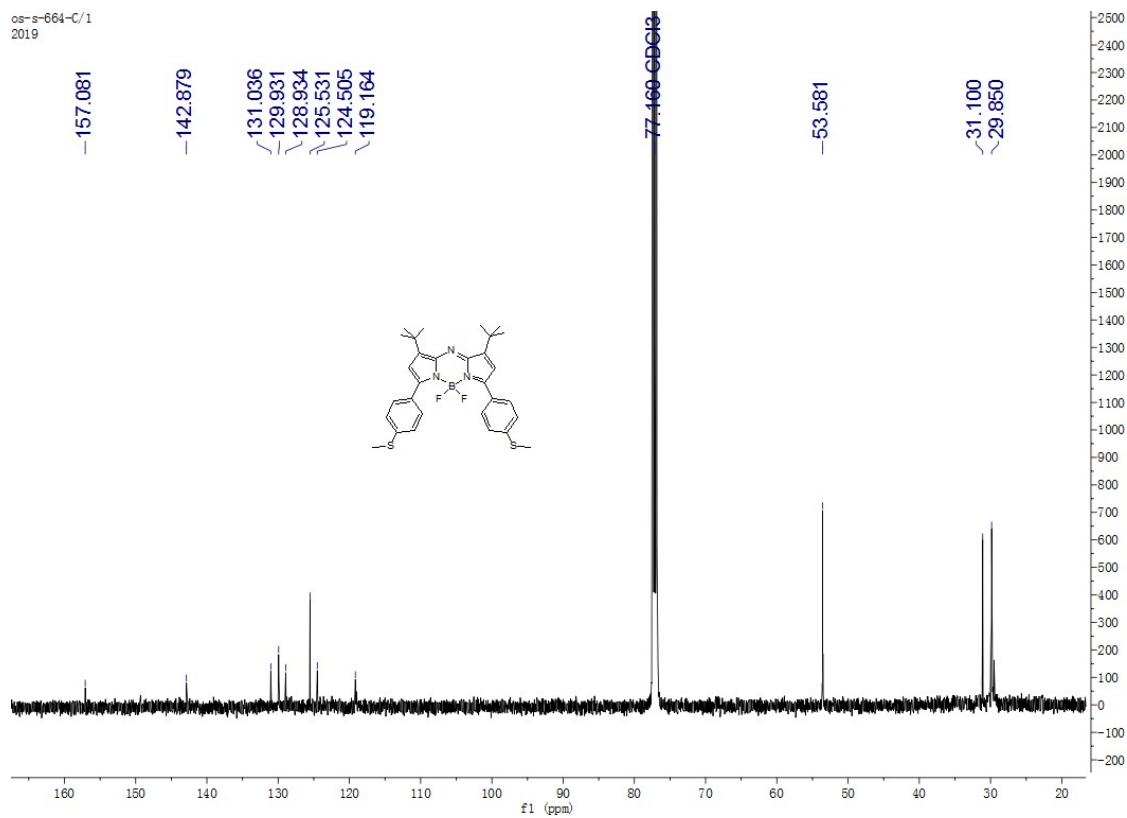

### 3. HRMS

1-5 #17 RT: 0.11 AV: 1 NL: 8.88E5  
T: FTMS + p ESI Full lock ms [80.0000-1200.0000]

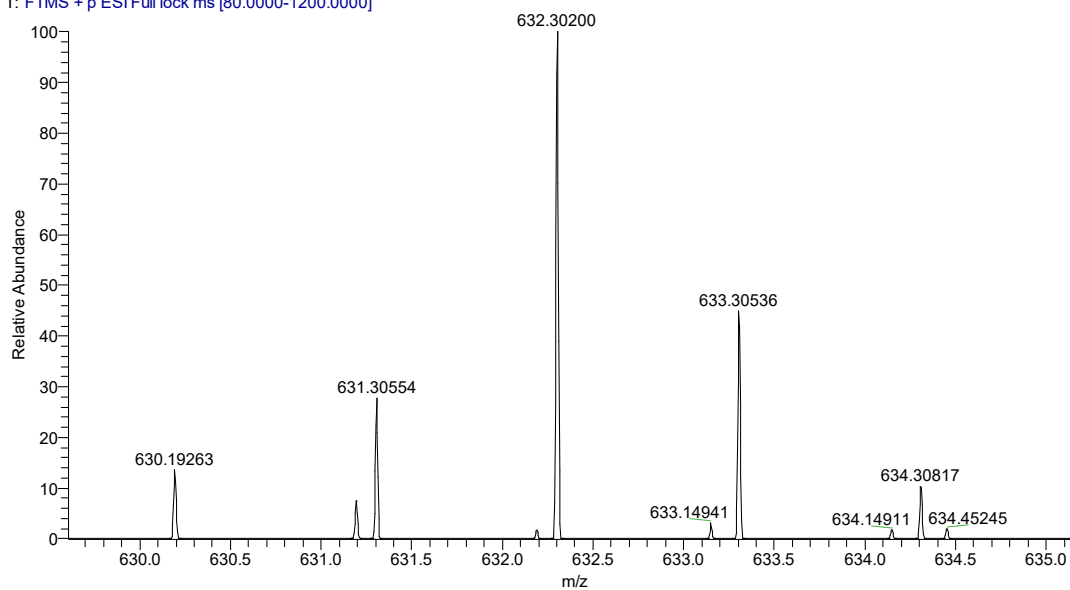

**DPh-tBuazaBDP:** HRMS (ESI) m/z calcd for  $C_{40}H_{38}BF_2N_3Na^+$  (M+Na)<sup>+</sup> 632.30191,  
found 632.30200.

1-6 #20 RT: 0.12 AV: 1 NL: 1.50E6  
T: FTMS + p ESI Full lock ms [80.0000-1200.0000]

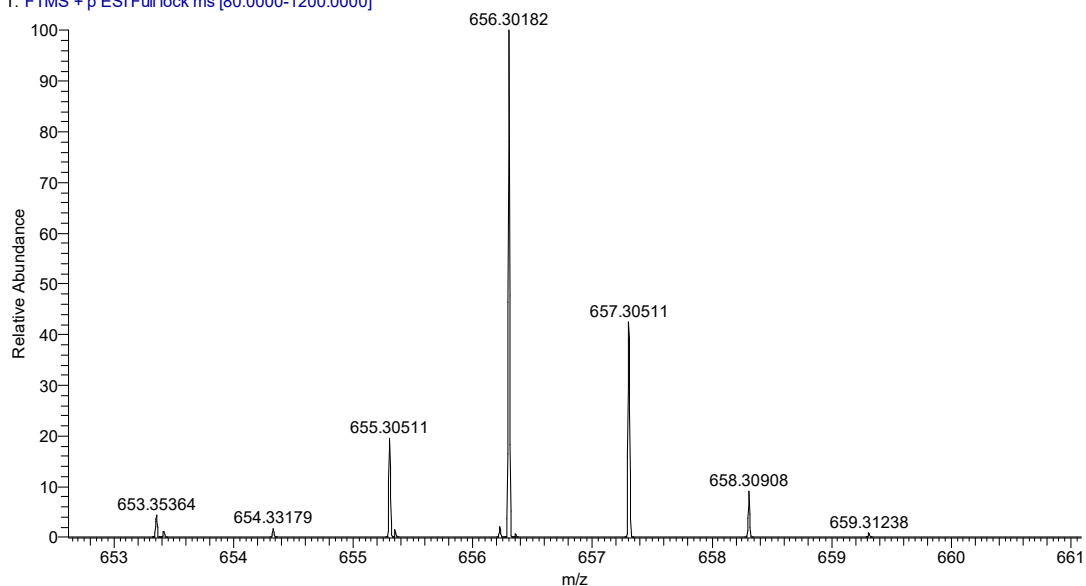

**Flu-tBuazaBDP:** HRMS (ESI) m/z calcd for  $C_{42}H_{38}BF_2N_3Na^+$  (M+Na)<sup>+</sup> 656.30191,  
found 656.30182.

1-4 #18 RT: 0.11 AV: 1 NL: 2.71E5  
T: FTMS + p ESI Full lock ms [80.0000-1200.0000]

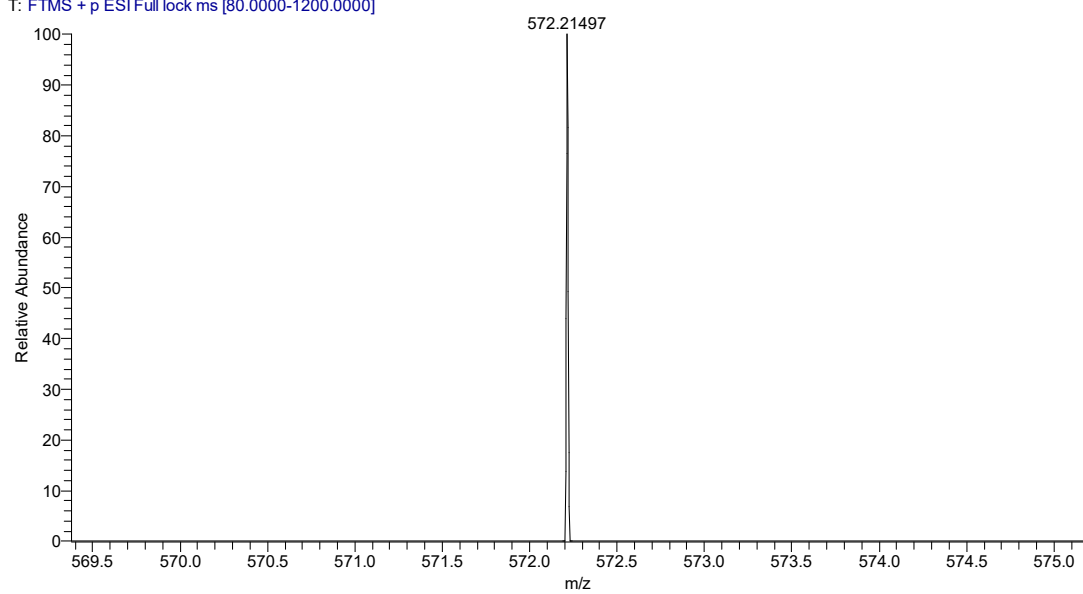

**S-tBuazaBDP:** HRMS (ESI) m/z calcd for  $C_{30}H_{34}BF_2N_3S_2Na^+$  (M+Na)<sup>+</sup> 572.21475, found 572.21497.

#### 4. Fig. S1-13

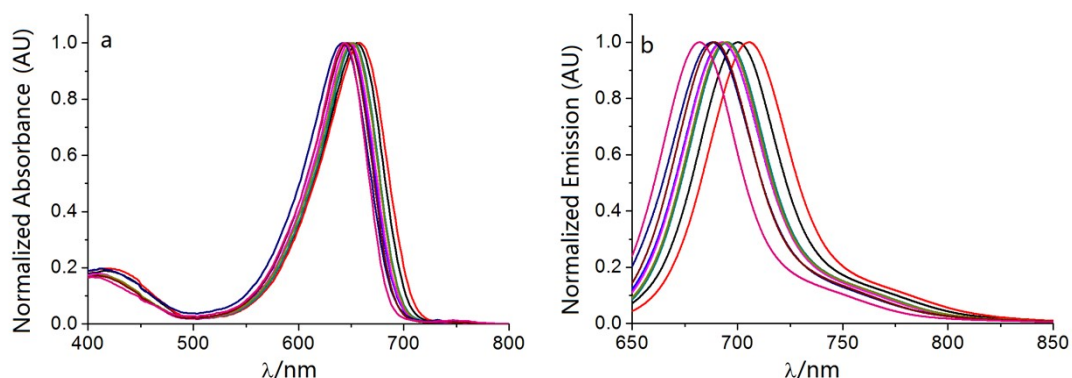

**Fig. S1.** a) Absorption and b) emission spectra of 5  $\mu\text{M}$  **DPh-tBuazaBDP** in DMF, DMSO,  $\text{CH}_2\text{Cl}_2$ , toluene,  $\text{CHCl}_3$ , THF,  $\text{CH}_3\text{CN}$ ,  $\text{CH}_3\text{COOEt}$  and *n*-hexane.  $\lambda_{\text{ex}} = 630$  nm.

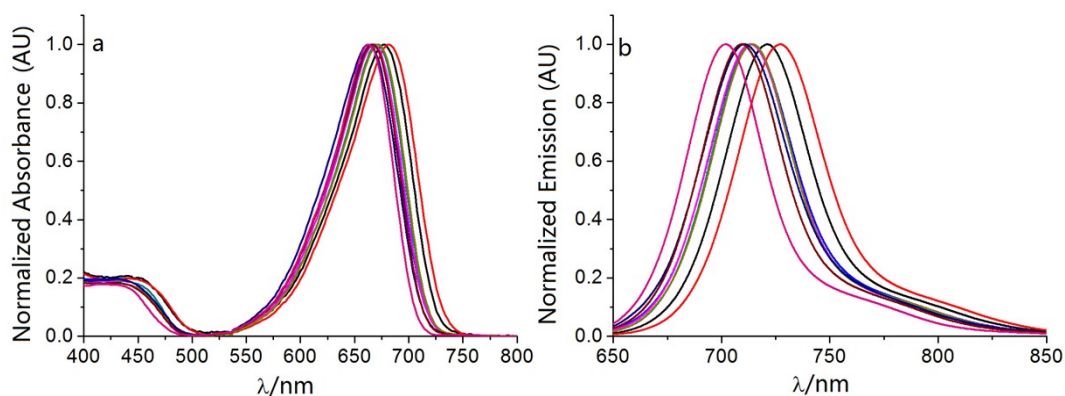

**Fig. S2.** a) Absorption and b) emission spectra of 5  $\mu\text{M}$  **Flu-tBuazaBDP** in DMF, DMSO,  $\text{CH}_2\text{Cl}_2$ , toluene,  $\text{CHCl}_3$ , THF,  $\text{CH}_3\text{CN}$ ,  $\text{CH}_3\text{COOEt}$  and *n*-hexane.  $\lambda_{\text{ex}} = 630$  nm

**Table S1** Optical properties of **aza-BODIPYs** in various solvents at 298 K.

| Dye                  | solvent                   | $\lambda_{\text{abs}}/\lambda_{\text{em}}$<br>(nm) | Stokes<br>shift (nm) | Fwhm<br>(nm) | $\epsilon$ [ $\text{M}^{-1}$<br>$\text{cm}^{-1}$ ] | $\phi$ |
|----------------------|---------------------------|----------------------------------------------------|----------------------|--------------|----------------------------------------------------|--------|
| <b>DPh-tBuazaBDP</b> | DMF                       | 656/700                                            | 44                   | 69           | 81500                                              | 0.11   |
|                      | DMSO                      | 658/705                                            | 47                   | 72           | 82000                                              | 0.11   |
|                      | $\text{CH}_2\text{Cl}_2$  | 650/693                                            | 43                   | 69           | 83000                                              | 0.13   |
|                      | toluene                   | 652/695                                            | 43                   | 65           | 85000                                              | 0.12   |
|                      | $\text{CHCl}_3$           | 648/693                                            | 45                   | 65           | 82500                                              | 0.14   |
|                      | THF                       | 652/694                                            | 42                   | 66           | 84000                                              | 0.12   |
|                      | $\text{CH}_3\text{CN}$    | 642/686                                            | 44                   | 69           | 81000                                              | 0.10   |
|                      | $\text{CH}_3\text{COOEt}$ | 646/689                                            | 43                   | 66           | 83500                                              | 0.12   |

|                      |                                 |         |    |    |       |      |
|----------------------|---------------------------------|---------|----|----|-------|------|
|                      | <i>n</i> -hexane                | 644/682 | 38 | 61 | 81000 | 0.16 |
|                      | DMF                             | 678/721 | 43 | 74 | 82000 | 0.10 |
|                      | DMSO                            | 682/726 | 45 | 77 | 83500 | 0.10 |
|                      | CH <sub>2</sub> Cl <sub>2</sub> | 668/713 | 45 | 74 | 84000 | 0.11 |
|                      | toluene                         | 670/714 | 44 | 71 | 86000 | 0.11 |
| <b>Flu-tBuazaBDP</b> | CHCl <sub>3</sub>               | 668/713 | 45 | 72 | 83000 | 0.14 |
|                      | THF                             | 672/714 | 42 | 72 | 85500 | 0.10 |
|                      | CH <sub>3</sub> CN              | 662/710 | 48 | 74 | 82500 | 0.09 |
|                      | CH <sub>3</sub> COOEt           | 666/709 | 43 | 71 | 85000 | 0.12 |
|                      | <i>n</i> -hexane                | 662/701 | 39 | 66 | 83000 | 0.14 |

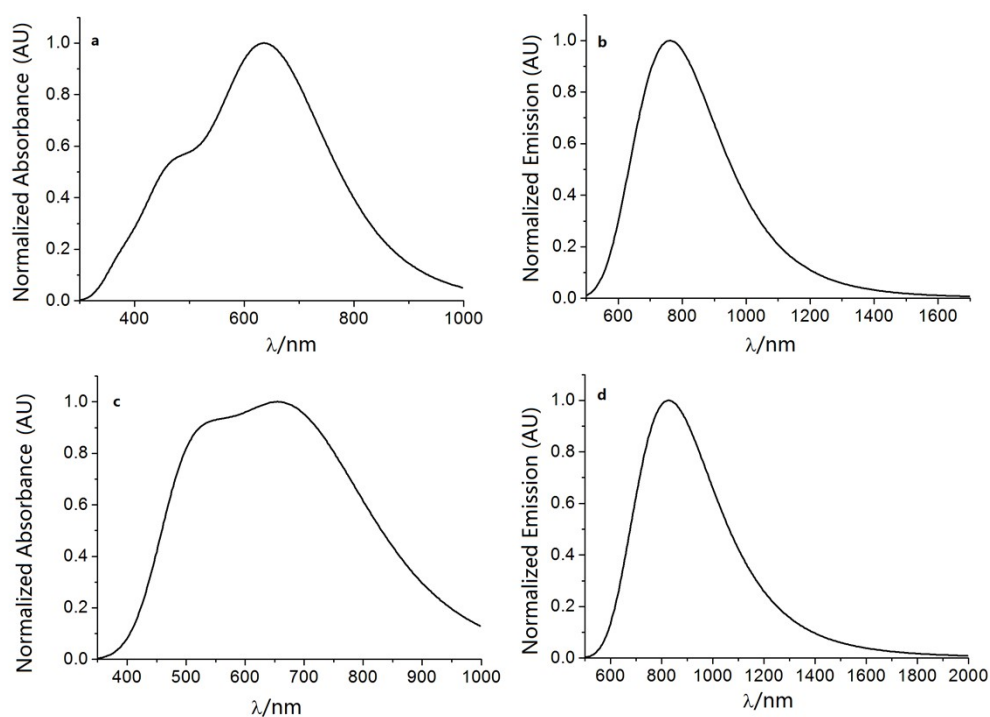

**Fig. S3** Calculated electronic spectra of **S-tBuazaBDP** (a, b) and **S-PhazaBDP** (c, d).

**Table. S2** Best computed estimate for  $\lambda_{\text{abs}}$ ,  $\lambda_{\text{em}}$  and Oscillator strength of **S-tBuazaBDP** and **S-PhazaBDP**.

| Dye                | $\lambda_{\text{abs}}$<br>[nm] | Oscillator<br>strength | $\lambda_{\text{em}}$ [nm] | Oscillator<br>strength |
|--------------------|--------------------------------|------------------------|----------------------------|------------------------|
| <b>S-tBuazaBDP</b> | 642.78                         | 0.8026                 | 761.68                     | 0.9665                 |
| <b>S-PhazaBDP</b>  | 689.88                         | 0.822                  | 828.36                     | 0.9684                 |



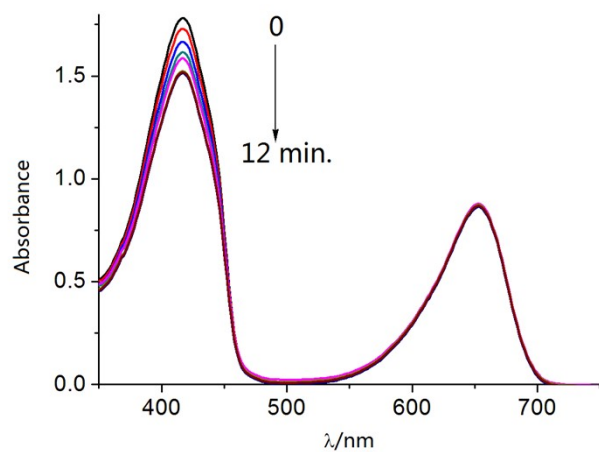

**Fig. S4** Time-dependent photodegradation of DPBF with 8  $\mu\text{M}$  Ph-tBuazaBDP.

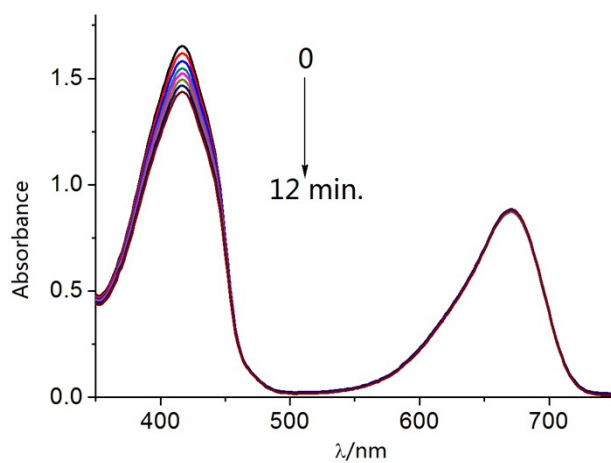

**Fig. S5** Time-dependent photodegradation of DPBF with 8  $\mu\text{M}$  Flu-tBuazaBDP.

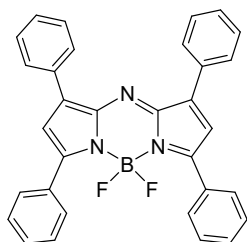

**Fig. S6** Structure of tetraphenyl aza-BODIPY.

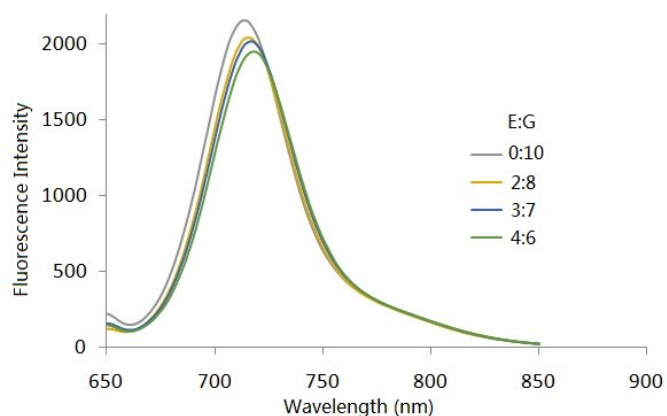

**Fig. S7** Fluorescence intensity changes of 12  $\mu\text{M}$  S-tBuazaBDP, as a function of viscosity in the mixture of ethylene glycol (E) and glycerol (G). Excitation wavelength: 620 nm.

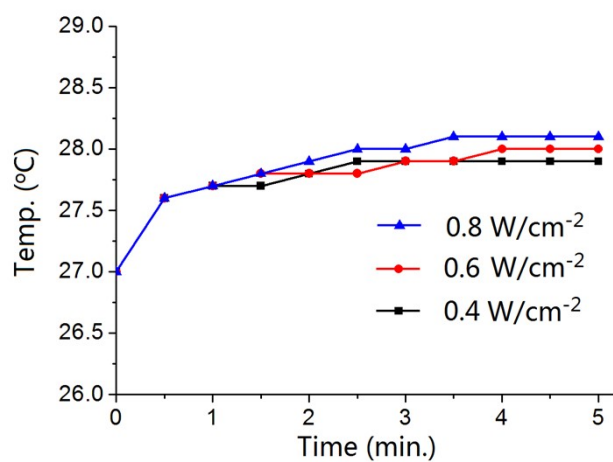

**Fig. S8** Temperature change of 10 ml water including 5 mg DSPE-PEG2000 under 690 nm laser irradiation with different exposure intensity (0.4, 0.6 and 0.8  $\text{W}\cdot\text{cm}^{-2}$ ).

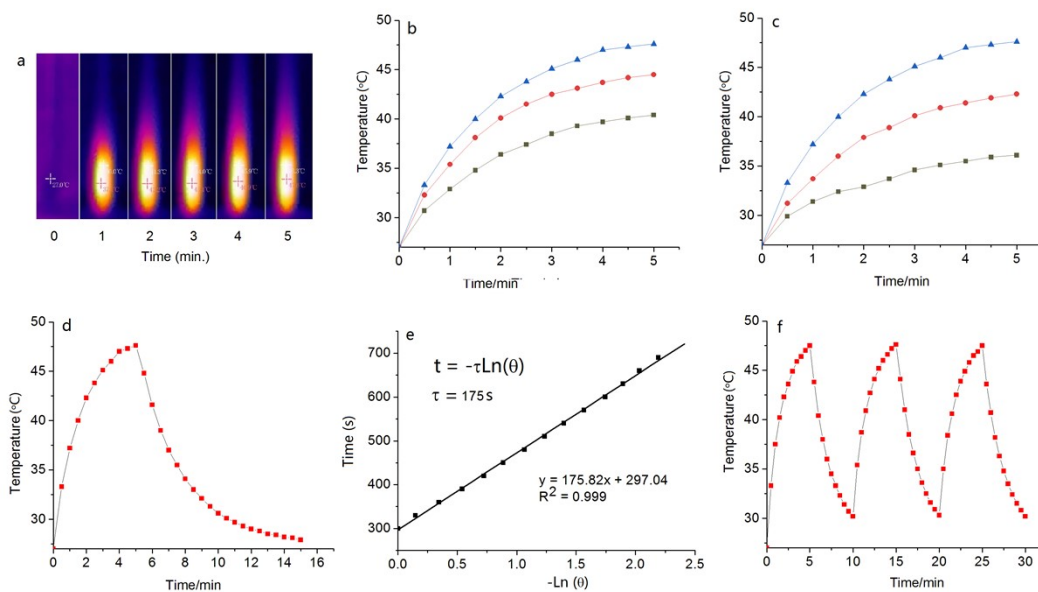

**Fig. S9** a) Photothermal images (27-47.6 °C) of **Flu-tBuazaBDP** NPs in water under 690 nm laser irradiation ( $0.8 \text{ W cm}^{-2}$ , 5 min). b) Photothermal conversion of **Flu-tBuazaBDP** NPs at different concentrations (20, 40 and  $80 \mu\text{M}$ ) under 690 nm laser irradiation ( $0.8 \text{ W cm}^{-2}$ ). c) Photothermal conversion of **Flu-tBuazaBDP** NPs ( $80 \mu\text{M}$ ) under 690 nm laser irradiation with different exposure intensity ( $0.4$ ,  $0.6$  and  $0.8 \text{ W cm}^{-2}$ ). d) Photothermal response curves of **Flu-tBuazaBDP** NPs aqueous solutions ( $80 \mu\text{M}$ ) under irradiation and after naturally cooling to room temperature. e) Linear fitting of  $-\text{Ln}\theta$  and time. f) Photothermal stability study of **Flu-tBuazaBDP** NPs during three circles of heating-cooling processes.

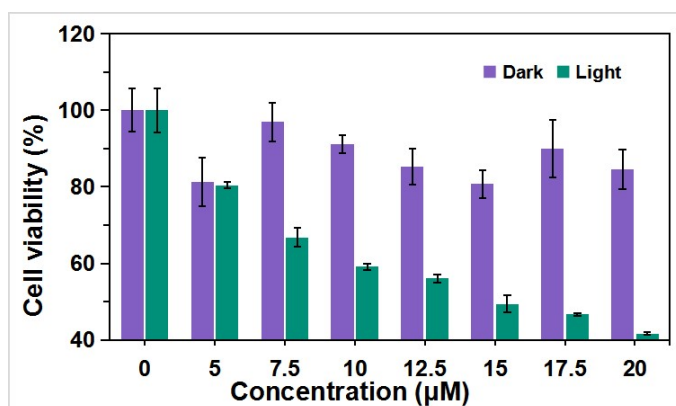

**Fig. S10** The cell viability under different S-tBuazaBDP-NPs concentration under no light or 635 nm NIR light radiation ( $10 \text{ mW} \cdot \text{cm}^{-2}$ , 10 min), respectively.

## 5. Data of X-ray analysis of S-tBuazaBDP

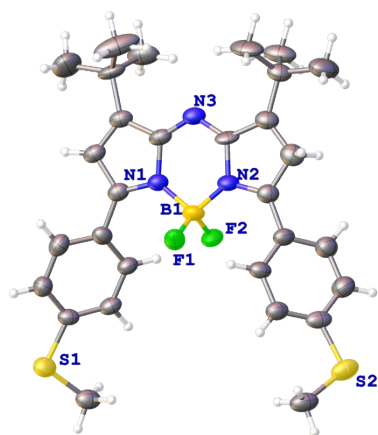

**Table 1 Crystal data and structure refinement for exp\_3226.**

|                                             |                                                                               |
|---------------------------------------------|-------------------------------------------------------------------------------|
| Identification code                         | exp_3226                                                                      |
| Empirical formula                           | C <sub>30</sub> H <sub>35</sub> BF <sub>2</sub> N <sub>3</sub> S <sub>2</sub> |
| Formula weight                              | 550.54                                                                        |
| Temperature/K                               | 149.99(10)                                                                    |
| Crystal system                              | triclinic                                                                     |
| Space group                                 | P-1                                                                           |
| a/Å                                         | 11.3095(9)                                                                    |
| b/Å                                         | 16.4925(16)                                                                   |
| c/Å                                         | 18.8024(15)                                                                   |
| α/°                                         | 99.542(7)                                                                     |
| β/°                                         | 103.146(7)                                                                    |
| γ/°                                         | 92.561(7)                                                                     |
| Volume/Å <sup>3</sup>                       | 3355.5(5)                                                                     |
| Z                                           | 4                                                                             |
| ρ <sub>calc</sub> /cm <sup>3</sup>          | 1.090                                                                         |
| μ/mm <sup>-1</sup>                          | 1.695                                                                         |
| F(000)                                      | 1164.0                                                                        |
| Crystal size/mm <sup>3</sup>                | 0.13 × 0.1 × 0.08                                                             |
| Radiation                                   | Cu Kα (λ = 1.54184)                                                           |
| 2θ range for data collection/°              | 4.908 to 149.414                                                              |
| Index ranges                                | -7 ≤ h ≤ 13, -19 ≤ k ≤ 20, -23 ≤ l ≤ 21                                       |
| Reflections collected                       | 21675                                                                         |
| Independent reflections                     | 12906 [R <sub>int</sub> = 0.1479, R <sub>sigma</sub> = 0.1627]                |
| Data/restraints/parameters                  | 12906/31/701                                                                  |
| Goodness-of-fit on F <sup>2</sup>           | 1.028                                                                         |
| Final R indexes [I ≥ 2σ (I)]                | R <sub>1</sub> = 0.1153, wR <sub>2</sub> = 0.3329                             |
| Final R indexes [all data]                  | R <sub>1</sub> = 0.1816, wR <sub>2</sub> = 0.4002                             |
| Largest diff. peak/hole / e Å <sup>-3</sup> | 0.87/-0.80                                                                    |

### Crystal structure determination of [exp\_3226]

**Crystal Data** for  $C_{30}H_{35}BF_2N_3S_2$  ( $M=550.54$  g/mol): triclinic, space group P-1 (no. 2),  $a = 11.3095(9)$  Å,  $b = 16.4925(16)$  Å,  $c = 18.8024(15)$  Å,  $\alpha = 99.542(7)^\circ$ ,  $\beta = 103.146(7)^\circ$ ,  $\gamma = 92.561(7)^\circ$ ,  $V = 3355.5(5)$  Å<sup>3</sup>,  $Z = 4$ ,  $T = 149.99(10)$  K,  $\mu(\text{Cu K}\alpha) = 1.695$  mm<sup>-1</sup>,  $D_{\text{calc}} = 1.090$  g/cm<sup>3</sup>, 21675 reflections measured ( $4.908^\circ \leq 2\Theta \leq 149.414^\circ$ ), 12906 unique ( $R_{\text{int}} = 0.1479$ ,  $R_{\text{sigma}} = 0.1627$ ) which were used in all calculations. The final  $R_1$  was 0.1153 ( $I > 2\sigma(I)$ ) and  $wR_2$  was 0.4002 (all data).

**Table 2 Fractional Atomic Coordinates ( $\times 10^4$ ) and Equivalent Isotropic Displacement Parameters ( $\text{\AA}^2 \times 10^3$ ) for exp\_3226.  $U_{\text{eq}}$  is defined as 1/3 of the trace of the orthogonalised  $U_{ij}$  tensor.**

| Atom | <i>x</i>   | <i>y</i>   | <i>z</i>   | $U_{\text{eq}}$ |
|------|------------|------------|------------|-----------------|
| S1   | 1935.3(13) | 6237.4(10) | 1477.1(9)  | 54.2(4)         |
| S2   | 5938.4(13) | 4255.3(11) | 6298.5(8)  | 59.8(4)         |
| F1   | 6265(3)    | 3964.1(19) | 2738.2(17) | 55.9(9)         |
| F2   | 4690(2)    | 3046(2)    | 2705.0(16) | 49.1(8)         |
| N1   | 5573(3)    | 2952(3)    | 1627(2)    | 38.3(10)        |
| N2   | 6646(3)    | 2527(3)    | 2793(2)    | 38.8(10)        |
| N3   | 6798(3)    | 1795(3)    | 1601(2)    | 41.7(11)        |
| C1   | 5877(4)    | 2357(3)    | 488(3)     | 43.7(13)        |
| C2   | 5231(4)    | 3041(3)    | 408(3)     | 43.2(13)        |
| C3   | 5022(4)    | 3379(3)    | 1109(3)    | 39.1(12)        |
| C4   | 6138(4)    | 2322(3)    | 1264(3)    | 41.0(13)        |
| C5   | 4266(4)    | 4071(3)    | 1229(3)    | 39.6(12)        |
| C6   | 3404(4)    | 4050(3)    | 1656(3)    | 41.4(12)        |
| C7   | 2678(4)    | 4701(3)    | 1733(3)    | 42.5(13)        |
| C8   | 2777(4)    | 5379(3)    | 1394(3)    | 38.9(12)        |
| C9   | 3606(5)    | 5385(4)    | 951(3)     | 46.7(14)        |
| C10  | 4348(5)    | 4726(4)    | 853(3)     | 49.7(15)        |
| C11  | 1115(5)    | 6069(4)    | 2157(3)    | 51.4(15)        |
| C12  | 7024(4)    | 1880(3)    | 2333(3)    | 39.6(12)        |
| C13  | 7633(5)    | 1330(4)    | 2771(3)    | 47.3(9)         |
| C14  | 7578(5)    | 1636(4)    | 3493(3)    | 52.0(15)        |
| C15  | 6960(4)    | 2377(3)    | 3498(3)    | 43.2(13)        |
| C16  | 8214(5)    | 557(4)     | 2506(3)    | 48.3(9)         |
| C17  | 8840(7)    | 192(5)     | 3171(4)    | 88(2)           |
| C18  | 9151(5)    | 783(4)     | 2093(4)    | 76(2)           |
| C19  | 7235(5)    | -70(4)     | 1989(4)    | 66(2)           |

**Table 2 Fractional Atomic Coordinates ( $\times 10^4$ ) and Equivalent Isotropic Displacement Parameters ( $\text{\AA}^2 \times 10^3$ ) for exp\_3226.  $U_{eq}$  is defined as 1/3 of the trace of the orthogonalised  $U_{ij}$  tensor.**

| Atom | <i>x</i>    | <i>y</i>   | <i>z</i>   | $U_{eq}$ |
|------|-------------|------------|------------|----------|
| C20  | 7505(6)     | 1651(6)    | 15(4)      | 111(3)   |
| C21  | 5518(6)     | 908(4)     | -138(4)    | 71.0(17) |
| C22  | 5663(8)     | 1954(5)    | -893(4)    | 92(2)    |
| C23  | 6165(5)     | 1741(4)    | -123(3)    | 51.5(10) |
| C24  | 6722(4)     | 2875(3)    | 4155(3)    | 43.3(13) |
| C25  | 6356(5)     | 2477(4)    | 4683(3)    | 53.3(16) |
| C26  | 6141(5)     | 2910(4)    | 5315(3)    | 57.7(16) |
| C27  | 6255(4)     | 3772(4)    | 5460(3)    | 47.3(14) |
| C28  | 6617(4)     | 4187(4)    | 4955(3)    | 45.9(14) |
| C29  | 6828(4)     | 3734(3)    | 4308(3)    | 44.1(13) |
| C30  | 6210(5)     | 5337(4)    | 6291(3)    | 64.2(19) |
| B1   | 5773(5)     | 3155(4)    | 2492(3)    | 41.6(14) |
| S3   | -3136.0(13) | 6437.3(10) | 1433.9(8)  | 53.1(4)  |
| S4   | 1226.9(14)  | 4448.6(11) | 6208.0(8)  | 58.6(4)  |
| F3   | -711(2)     | 2891.2(18) | 2461.1(15) | 40.9(7)  |
| F4   | 757(2)      | 3957.3(18) | 2672.6(15) | 40.7(7)  |
| N4   | 301(3)      | 3037(3)    | 1485(2)    | 38.2(10) |
| N5   | 1556(3)     | 1900(3)    | 1434(2)    | 37.7(10) |
| N6   | 1380(3)     | 2570(3)    | 2637(2)    | 38.8(10) |
| C31  | 595(4)      | 2471(3)    | 336(3)     | 39.9(12) |
| C32  | -71(4)      | 3142(3)    | 268(3)     | 41.8(13) |
| C33  | 852(4)      | 2410(3)    | 1104(3)    | 36.5(11) |
| C34  | -273(4)     | 3480(3)    | 979(3)     | 34.9(11) |
| C35  | -1008(4)    | 4167(3)    | 1104(3)    | 37.7(12) |
| C36  | -1632(4)    | 4272(3)    | 1665(3)    | 39.3(12) |
| C37  | -2306(4)    | 4953(3)    | 1772(3)    | 40.8(13) |
| C38  | -2366(4)    | 5550(3)    | 1332(3)    | 35.6(12) |
| C39  | -1777(4)    | 5445(3)    | 747(3)     | 43.2(13) |
| C40  | -1114(4)    | 4761(3)    | 641(3)     | 43.1(13) |
| C41  | -3683(6)    | 6392(4)    | 2247(3)    | 67.7(19) |
| C42  | 974(4)      | 1889(4)    | -271(3)    | 44.9(14) |
| C43  | 2382(5)     | 2053(4)    | -147(3)    | 55.4(16) |
| C44  | 661(5)      | 984(4)     | -230(3)    | 55.4(16) |
| C45  | 370(5)      | 2075(4)    | -1033(3)   | 56.8(17) |
| C46  | 1829(4)     | 1968(3)    | 2163(3)    | 38.2(12) |
| C47  | 2651(4)     | 1516(3)    | 2603(3)    | 40.7(13) |

**Table 2 Fractional Atomic Coordinates ( $\times 10^4$ ) and Equivalent Isotropic Displacement Parameters ( $\text{\AA}^2 \times 10^3$ ) for exp\_3226.  $U_{eq}$  is defined as 1/3 of of the trace of the orthogonalised  $U_{ij}$  tensor.**

| Atom | x       | y       | z       | U(eq)    |
|------|---------|---------|---------|----------|
| C48  | 2700(4) | 1854(3) | 3330(3) | 43.6(13) |
| C49  | 1905(4) | 2501(3) | 3344(3) | 38.2(12) |
| C50  | 3278(4) | 774(3)  | 2313(3) | 44.9(14) |
| C51  | 4209(5) | 538(4)  | 2953(4) | 61.6(16) |
| C52  | 2304(5) | 47(4)   | 1963(4) | 57.8(17) |
| C53  | 3937(5) | 997(4)  | 1728(3) | 59.1(17) |
| C54  | 1679(4) | 2979(4) | 4016(3) | 43.8(13) |
| C55  | 2656(4) | 3207(4) | 4633(3) | 44.4(14) |
| C56  | 2489(4) | 3640(4) | 5287(3) | 51.5(16) |
| C57  | 1326(5) | 3888(4) | 5359(3) | 48.6(14) |
| C58  | 358(5)  | 3633(4) | 4747(3) | 47.4(14) |
| C59  | 510(4)  | 3195(4) | 4079(3) | 45.9(14) |
| C60  | -380(5) | 4504(4) | 6110(3) | 57.7(17) |
| B5   | 411(5)  | 3140(4) | 2335(3) | 38.4(14) |

**Table 3 Anisotropic Displacement Parameters ( $\text{\AA}^2 \times 10^3$ ) for exp\_3226. The Anisotropic displacement factor exponent takes the form:  $-2\pi^2[h^2a^{*2}U_{11}+2hka^*b^*U_{12}+\dots]$ .**

| Atom | $U_{11}$ | $U_{22}$ | $U_{33}$ | $U_{23}$ | $U_{13}$ | $U_{12}$ |
|------|----------|----------|----------|----------|----------|----------|
| S1   | 58.0(7)  | 54.7(8)  | 50.3(8)  | 8.3(6)   | 12.2(6)  | 18.4(6)  |
| S2   | 50.9(7)  | 79.3(11) | 41.3(7)  | -8.7(7)  | 8.4(6)   | 7.4(7)   |
| F1   | 89(2)    | 36.7(17) | 37.0(16) | -1.1(13) | 10.6(15) | 2.6(16)  |
| F2   | 47.2(14) | 62.4(19) | 44.8(16) | 10.8(14) | 21.2(12) | 22.4(13) |
| N1   | 38.4(19) | 38(2)    | 37(2)    | 1.1(18)  | 10.5(16) | 7.3(17)  |
| N2   | 33.4(18) | 42(2)    | 41(2)    | 0.6(18)  | 12.2(16) | 10.9(17) |
| N3   | 34.6(18) | 46(2)    | 42(2)    | -1.8(19) | 10.1(17) | 7.5(18)  |
| C1   | 42(2)    | 44(3)    | 42(3)    | -6(2)    | 15(2)    | 2(2)     |
| C2   | 44(2)    | 46(3)    | 38(3)    | -2(2)    | 15(2)    | 0(2)     |
| C3   | 37(2)    | 42(3)    | 36(2)    | -1(2)    | 9.0(19)  | -1(2)    |
| C4   | 40(2)    | 42(3)    | 39(2)    | -6(2)    | 15(2)    | 1(2)     |
| C5   | 44(2)    | 36(3)    | 34(2)    | 0(2)     | 4(2)     | 5(2)     |
| C6   | 42(2)    | 48(3)    | 36(2)    | 4(2)     | 13.7(19) | 10(2)    |
| C7   | 40(2)    | 50(3)    | 37(2)    | 0(2)     | 14(2)    | 5(2)     |
| C8   | 36(2)    | 40(3)    | 37(2)    | -1(2)    | 7.4(19)  | 11(2)    |
| C9   | 54(3)    | 46(3)    | 42(3)    | 10(2)    | 14(2)    | 7(2)     |
| C10  | 53(3)    | 59(4)    | 39(3)    | 9(2)     | 13(2)    | 2(3)     |



**Table 3 Anisotropic Displacement Parameters ( $\text{\AA}^2 \times 10^3$ ) for exp\_3226. The Anisotropic displacement factor exponent takes the form:  $-2\pi^2[h^2a^{*2}U_{11}+2hka^*b^*U_{12}+\dots]$ .**

| Atom | $U_{11}$ | $U_{22}$ | $U_{33}$ | $U_{23}$  | $U_{13}$ | $U_{12}$ |
|------|----------|----------|----------|-----------|----------|----------|
| C11  | 44(3)    | 56(3)    | 47(3)    | -1(3)     | 2(2)     | 15(2)    |
| C12  | 25.7(18) | 49(3)    | 43(3)    | -7(2)     | 15.6(18) | 11.0(19) |
| C13  | 40.2(15) | 47.3(16) | 53.2(16) | 1.9(15)   | 12.8(14) | 10.3(14) |
| C14  | 40(2)    | 55(3)    | 59(3)    | 8(3)      | 7(2)     | 6(2)     |
| C15  | 40(2)    | 45(3)    | 41(3)    | 1(2)      | 6(2)     | 7(2)     |
| C16  | 41.2(15) | 46.0(16) | 55.8(17) | 1.0(15)   | 11.9(15) | 13.4(14) |
| C17  | 105(5)   | 82(5)    | 76(5)    | 5(4)      | 19(4)    | 55(4)    |
| C18  | 61(3)    | 61(4)    | 114(5)   | -7(4)     | 50(3)    | 20(3)    |
| C19  | 44(3)    | 52(4)    | 96(5)    | -14(3)    | 24(3)    | 10(3)    |
| C20  | 46.2(17) | 176(8)   | 82(5)    | -59(5)    | 19(2)    | 2(3)     |
| C21  | 70(3)    | 55(2)    | 79(4)    | -22(2)    | 27(3)    | -3.8(19) |
| C22  | 136(6)   | 84(5)    | 49(2)    | -10(2)    | 22(3)    | 16(4)    |
| C23  | 50.4(16) | 56(2)    | 45.8(18) | -17.0(17) | 25.8(17) | 3.1(16)  |
| C24  | 45(2)    | 49(3)    | 34(2)    | 1(2)      | 6(2)     | 16(2)    |
| C25  | 58(3)    | 54(4)    | 46(3)    | 7(3)      | 10(3)    | 12(3)    |
| C26  | 63(3)    | 64(4)    | 49(3)    | 8(3)      | 20(3)    | 12(3)    |
| C27  | 34(2)    | 59(3)    | 41(3)    | -9(2)     | 0(2)     | 15(2)    |
| C28  | 45(2)    | 51(3)    | 38(3)    | 0(2)      | 6(2)     | 12(2)    |
| C29  | 45(2)    | 43(3)    | 42(3)    | 0(2)      | 8(2)     | 16(2)    |
| C30  | 60(3)    | 78(4)    | 49(3)    | -8(3)     | 10(3)    | 23(3)    |
| B1   | 47(3)    | 34(3)    | 41(3)    | -5(2)     | 12(2)    | 8(2)     |
| S3   | 57.8(7)  | 53.3(8)  | 50.4(8)  | 8.4(6)    | 14.4(6)  | 22.8(6)  |
| S4   | 59.8(8)  | 70.7(10) | 36.1(7)  | -9.7(7)   | 5.1(6)   | 13.0(7)  |
| F3   | 32.9(12) | 51.5(17) | 37.7(14) | 6.4(13)   | 7.6(11)  | 8.1(12)  |
| F4   | 41.5(13) | 41.5(16) | 36.9(14) | -2.2(12)  | 10.4(11) | 9.3(12)  |
| N4   | 40.7(19) | 39(2)    | 33(2)    | -3.5(17)  | 12.0(16) | 5.4(17)  |
| N5   | 32.4(17) | 44(2)    | 33(2)    | -4.1(17)  | 6.9(16)  | 7.2(17)  |
| N6   | 33.6(18) | 44(2)    | 34(2)    | -2.6(18)  | 6.0(16)  | 1.8(17)  |
| C31  | 34(2)    | 45(3)    | 34(2)    | -4(2)     | 3.0(19)  | 4(2)     |
| C32  | 38(2)    | 54(3)    | 33(2)    | 2(2)      | 9.9(19)  | 8(2)     |
| C33  | 36(2)    | 40(3)    | 32(2)    | -8(2)     | 14.9(18) | 9.5(19)  |
| C34  | 33(2)    | 39(3)    | 33(2)    | 3.6(19)   | 10.7(18) | 6.2(19)  |
| C35  | 27.9(19) | 48(3)    | 35(2)    | -3(2)     | 8.7(18)  | 9.6(19)  |
| C36  | 35(2)    | 53(3)    | 29(2)    | 4(2)      | 6.7(18)  | 8(2)     |
| C37  | 34(2)    | 50(3)    | 38(2)    | 1(2)      | 11.3(19) | 6(2)     |
| C38  | 21.9(17) | 47(3)    | 36(2)    | 3(2)      | 5.0(17)  | 18.2(18) |
| C39  | 47(3)    | 41(3)    | 41(3)    | 7(2)      | 10(2)    | 14(2)    |

**Table 3 Anisotropic Displacement Parameters ( $\text{\AA}^2 \times 10^3$ ) for exp\_3226. The Anisotropic displacement factor exponent takes the form:  $-2\pi^2[h^2a^*2U_{11}+2hka^*b^*U_{12}+\dots]$ .**

| Atom | $U_{11}$ | $U_{22}$ | $U_{33}$ | $U_{23}$ | $U_{13}$ | $U_{12}$ |
|------|----------|----------|----------|----------|----------|----------|
| C40  | 43(2)    | 51(3)    | 33(2)    | -1(2)    | 12(2)    | -2(2)    |
| C41  | 76(4)    | 74(4)    | 52(4)    | 7(3)     | 11(3)    | 39(3)    |
| C42  | 37(2)    | 60(3)    | 33(2)    | -2(2)    | 6(2)     | 8(2)     |
| C43  | 43(3)    | 80(4)    | 42(3)    | 5(3)     | 12(2)    | 10(3)    |
| C44  | 56(3)    | 53(3)    | 51(3)    | -9(3)    | 10(3)    | 14(3)    |
| C45  | 61(3)    | 68(4)    | 35(3)    | -10(3)   | 10(2)    | 10(3)    |
| C46  | 34(2)    | 40(3)    | 39(2)    | -1(2)    | 9.3(19)  | 9.3(19)  |
| C47  | 31(2)    | 52(3)    | 40(3)    | 5(2)     | 10.0(19) | 9(2)     |
| C48  | 37(2)    | 48(3)    | 44(3)    | 5(2)     | 9(2)     | 4(2)     |
| C49  | 25.8(19) | 51(3)    | 38(2)    | 0(2)     | 12.7(18) | 10.7(19) |
| C50  | 36(2)    | 51(3)    | 46(3)    | 0(2)     | 10(2)    | 20(2)    |
| C51  | 57(2)    | 62(3)    | 64(3)    | 2(2)     | 13(2)    | 27(2)    |
| C52  | 50(3)    | 50(3)    | 73(4)    | -4(3)    | 23(3)    | 14(2)    |
| C53  | 43(3)    | 73(4)    | 60(4)    | -2(3)    | 19(2)    | 15(3)    |
| C54  | 42(2)    | 51(3)    | 36(3)    | 4(2)     | 7(2)     | 8(2)     |
| C55  | 33(2)    | 60(3)    | 35(3)    | 1(2)     | 5(2)     | 12(2)    |
| C56  | 34(2)    | 73(4)    | 41(3)    | 5(3)     | -3(2)    | 13(2)    |
| C57  | 51(3)    | 50(3)    | 38(3)    | 0(2)     | 4(2)     | 8(2)     |
| C58  | 40(2)    | 65(4)    | 35(3)    | 4(2)     | 6(2)     | 10(2)    |
| C59  | 37(2)    | 60(3)    | 36(3)    | -2(2)    | 6(2)     | 11(2)    |
| C60  | 61(3)    | 66(4)    | 46(3)    | -1(3)    | 18(3)    | 17(3)    |
| B5   | 38(2)    | 36(3)    | 40(3)    | 4(2)     | 7(2)     | 11(2)    |

**Table 4 Bond Lengths for exp\_3226.**

| Atom | Atom | Length/ $\text{\AA}$ | Atom | Atom | Length/ $\text{\AA}$ |
|------|------|----------------------|------|------|----------------------|
| S1   | C8   | 1.747(5)             | S3   | C38  | 1.741(5)             |
| S1   | C11  | 1.792(6)             | S3   | C41  | 1.785(7)             |
| S2   | C27  | 1.765(6)             | S4   | C57  | 1.737(6)             |
| S2   | C30  | 1.799(7)             | S4   | C60  | 1.792(6)             |
| F1   | B1   | 1.385(7)             | F3   | B5   | 1.399(6)             |
| F2   | B1   | 1.386(7)             | F4   | B5   | 1.389(6)             |
| N1   | C3   | 1.350(7)             | N4   | C33  | 1.408(6)             |
| N1   | C4   | 1.407(6)             | N4   | C34  | 1.362(6)             |
| N1   | B1   | 1.566(7)             | N4   | B5   | 1.553(7)             |
| N2   | C12  | 1.404(6)             | N5   | C33  | 1.317(6)             |
| N2   | C15  | 1.358(7)             | N5   | C46  | 1.319(6)             |

**Table 4 Bond Lengths for exp\_3226.**

| Atom | Atom | Length/Å  | Atom | Atom | Length/Å |
|------|------|-----------|------|------|----------|
| N2   | B1   | 1.549(7)  | N6   | C46  | 1.412(6) |
| N3   | C4   | 1.319(7)  | N6   | C49  | 1.353(6) |
| N3   | C12  | 1.324(6)  | N6   | B5   | 1.548(7) |
| C1   | C2   | 1.381(8)  | C31  | C32  | 1.372(7) |
| C1   | C4   | 1.433(7)  | C31  | C33  | 1.430(7) |
| C1   | C23  | 1.507(7)  | C31  | C42  | 1.518(7) |
| C2   | C3   | 1.419(7)  | C32  | C34  | 1.432(7) |
| C3   | C5   | 1.475(7)  | C34  | C35  | 1.455(7) |
| C5   | C6   | 1.399(7)  | C35  | C36  | 1.388(7) |
| C5   | C10  | 1.396(8)  | C35  | C40  | 1.407(8) |
| C6   | C7   | 1.390(7)  | C36  | C37  | 1.398(7) |
| C7   | C8   | 1.387(8)  | C37  | C38  | 1.381(8) |
| C8   | C9   | 1.390(7)  | C38  | C39  | 1.403(7) |
| C9   | C10  | 1.416(8)  | C39  | C40  | 1.394(7) |
| C12  | C13  | 1.423(8)  | C42  | C43  | 1.560(7) |
| C13  | C14  | 1.383(8)  | C42  | C44  | 1.537(8) |
| C13  | C16  | 1.523(8)  | C42  | C45  | 1.528(8) |
| C14  | C15  | 1.435(8)  | C46  | C47  | 1.422(7) |
| C15  | C24  | 1.452(7)  | C47  | C48  | 1.376(7) |
| C16  | C17  | 1.520(9)  | C47  | C50  | 1.525(7) |
| C16  | C18  | 1.516(9)  | C48  | C49  | 1.427(7) |
| C16  | C19  | 1.521(8)  | C49  | C54  | 1.455(7) |
| C20  | C23  | 1.496(8)  | C50  | C51  | 1.525(8) |
| C21  | C23  | 1.521(9)  | C50  | C52  | 1.541(8) |
| C22  | C23  | 1.534(10) | C50  | C53  | 1.544(8) |
| C24  | C25  | 1.403(8)  | C54  | C55  | 1.394(7) |
| C24  | C29  | 1.392(8)  | C54  | C59  | 1.410(7) |
| C25  | C26  | 1.360(8)  | C55  | C56  | 1.374(7) |
| C26  | C27  | 1.397(9)  | C56  | C57  | 1.424(7) |
| C27  | C28  | 1.380(8)  | C57  | C58  | 1.387(7) |
| C28  | C29  | 1.392(7)  | C58  | C59  | 1.391(7) |

**Table 5 Bond Angles for exp\_3226.**

| Atom | Atom | Atom | Angle/°  | Atom | Atom | Atom | Angle/°  |
|------|------|------|----------|------|------|------|----------|
| C8   | S1   | C11  | 103.9(3) | C38  | S3   | C41  | 103.4(3) |
| C27  | S2   | C30  | 103.3(3) | C57  | S4   | C60  | 103.5(3) |
| C3   | N1   | C4   | 107.0(4) | C33  | N4   | B5   | 121.8(4) |

**Table 5 Bond Angles for exp\_3226.**

| Atom | Atom | Atom | Angle/°  | Atom | Atom | Atom | Angle/°  |
|------|------|------|----------|------|------|------|----------|
| C3   | N1   | B1   | 129.5(4) | C34  | N4   | C33  | 107.4(4) |
| C4   | N1   | B1   | 122.9(4) | C34  | N4   | B5   | 130.7(4) |
| C12  | N2   | B1   | 123.3(4) | C33  | N5   | C46  | 121.0(4) |
| C15  | N2   | C12  | 107.4(4) | C46  | N6   | B5   | 122.1(4) |
| C15  | N2   | B1   | 127.8(4) | C49  | N6   | C46  | 107.5(4) |
| C4   | N3   | C12  | 119.4(4) | C49  | N6   | B5   | 130.3(4) |
| C2   | C1   | C4   | 105.8(5) | C32  | C31  | C33  | 106.1(4) |
| C2   | C1   | C23  | 127.0(5) | C32  | C31  | C42  | 128.2(5) |
| C4   | C1   | C23  | 127.0(5) | C33  | C31  | C42  | 125.7(5) |
| C1   | C2   | C3   | 108.2(5) | C31  | C32  | C34  | 108.9(5) |
| N1   | C3   | C2   | 109.9(5) | N4   | C33  | C31  | 109.0(4) |
| N1   | C3   | C5   | 126.1(5) | N5   | C33  | N4   | 123.8(4) |
| C2   | C3   | C5   | 123.9(5) | N5   | C33  | C31  | 127.1(4) |
| N1   | C4   | C1   | 108.9(5) | N4   | C34  | C32  | 108.5(4) |
| N3   | C4   | N1   | 124.1(5) | N4   | C34  | C35  | 127.6(4) |
| N3   | C4   | C1   | 127.0(5) | C32  | C34  | C35  | 123.9(5) |
| C6   | C5   | C3   | 121.5(5) | C36  | C35  | C34  | 123.2(5) |
| C10  | C5   | C3   | 118.5(5) | C36  | C35  | C40  | 117.1(5) |
| C10  | C5   | C6   | 119.8(5) | C40  | C35  | C34  | 119.7(5) |
| C7   | C6   | C5   | 119.8(5) | C35  | C36  | C37  | 121.0(5) |
| C6   | C7   | C8   | 121.8(5) | C38  | C37  | C36  | 121.5(5) |
| C7   | C8   | S1   | 125.2(4) | C37  | C38  | S3   | 125.4(4) |
| C7   | C8   | C9   | 118.2(5) | C37  | C38  | C39  | 118.6(4) |
| C9   | C8   | S1   | 116.6(4) | C39  | C38  | S3   | 116.0(4) |
| C8   | C9   | C10  | 121.3(5) | C40  | C39  | C38  | 119.4(5) |
| C5   | C10  | C9   | 119.0(5) | C39  | C40  | C35  | 122.3(5) |
| N2   | C12  | C13  | 109.6(5) | C31  | C42  | C43  | 107.2(4) |
| N3   | C12  | N2   | 124.2(5) | C31  | C42  | C44  | 111.0(5) |
| N3   | C12  | C13  | 126.2(5) | C31  | C42  | C45  | 110.3(5) |
| C12  | C13  | C16  | 127.5(5) | C44  | C42  | C43  | 109.4(5) |
| C14  | C13  | C12  | 105.7(5) | C45  | C42  | C43  | 108.2(5) |
| C14  | C13  | C16  | 126.8(5) | C45  | C42  | C44  | 110.6(5) |
| C13  | C14  | C15  | 108.6(5) | N5   | C46  | N6   | 123.2(4) |
| N2   | C15  | C14  | 108.6(5) | N5   | C46  | C47  | 127.7(5) |
| N2   | C15  | C24  | 126.5(5) | N6   | C46  | C47  | 108.9(4) |
| C14  | C15  | C24  | 124.8(5) | C46  | C47  | C50  | 126.1(5) |
| C13  | C16  | C17  | 109.5(5) | C48  | C47  | C46  | 106.0(5) |
| C18  | C16  | C13  | 109.2(5) | C48  | C47  | C50  | 127.8(5) |

**Table 5 Bond Angles for exp\_3226.**

| Atom | Atom | Atom | Angle/°  | Atom | Atom | Atom | Angle/°  |
|------|------|------|----------|------|------|------|----------|
| C18  | C16  | C17  | 109.3(5) | C47  | C48  | C49  | 109.0(5) |
| C18  | C16  | C19  | 109.6(5) | N6   | C49  | C48  | 108.7(4) |
| C19  | C16  | C13  | 109.4(4) | N6   | C49  | C54  | 126.6(4) |
| C19  | C16  | C17  | 109.8(6) | C48  | C49  | C54  | 124.7(5) |
| C1   | C23  | C21  | 108.4(5) | C47  | C50  | C52  | 108.6(4) |
| C1   | C23  | C22  | 112.1(5) | C47  | C50  | C53  | 109.5(5) |
| C20  | C23  | C1   | 111.0(5) | C51  | C50  | C47  | 109.7(4) |
| C20  | C23  | C21  | 108.2(6) | C51  | C50  | C52  | 109.6(5) |
| C20  | C23  | C22  | 111.3(6) | C51  | C50  | C53  | 109.1(4) |
| C21  | C23  | C22  | 105.5(5) | C52  | C50  | C53  | 110.2(5) |
| C25  | C24  | C15  | 118.9(5) | C55  | C54  | C49  | 118.4(4) |
| C29  | C24  | C15  | 124.9(5) | C55  | C54  | C59  | 118.6(5) |
| C29  | C24  | C25  | 116.3(5) | C59  | C54  | C49  | 122.9(4) |
| C26  | C25  | C24  | 121.6(6) | C56  | C55  | C54  | 120.8(5) |
| C25  | C26  | C27  | 121.2(6) | C55  | C56  | C57  | 121.7(5) |
| C26  | C27  | S2   | 116.5(5) | C56  | C57  | S4   | 117.7(4) |
| C28  | C27  | S2   | 124.6(5) | C58  | C57  | S4   | 125.7(4) |
| C28  | C27  | C26  | 118.9(5) | C58  | C57  | C56  | 116.6(5) |
| C27  | C28  | C29  | 119.1(6) | C57  | C58  | C59  | 122.5(5) |
| C28  | C29  | C24  | 122.9(6) | C58  | C59  | C54  | 119.7(5) |
| F1   | B1   | N1   | 108.5(5) | F3   | B5   | N4   | 109.4(4) |
| F1   | B1   | N2   | 112.6(4) | F3   | B5   | N6   | 109.5(5) |
| F2   | B1   | F1   | 110.0(4) | F4   | B5   | F3   | 110.0(4) |
| F2   | B1   | N1   | 111.4(4) | F4   | B5   | N4   | 110.2(5) |
| F2   | B1   | N2   | 108.8(5) | F4   | B5   | N6   | 110.8(4) |
| N2   | B1   | N1   | 105.5(4) | N6   | B5   | N4   | 106.9(4) |

**Table 6 Torsion Angles for exp\_3226.**

| A  | B   | C   | D   | Angle/°   | A  | B   | C   | D   | Angle/°  |
|----|-----|-----|-----|-----------|----|-----|-----|-----|----------|
| S1 | C8  | C9  | C10 | 179.1(4)  | S3 | C38 | C39 | C40 | 178.3(4) |
| S2 | C27 | C28 | C29 | -179.3(4) | S4 | C57 | C58 | C59 | 179.0(5) |
| N1 | C3  | C5  | C6  | -42.9(7)  | N4 | C34 | C35 | C36 | -26.7(8) |
| N1 | C3  | C5  | C10 | 142.8(5)  | N4 | C34 | C35 | C40 | 153.7(5) |
| N2 | C12 | C13 | C14 | 2.1(6)    | N5 | C46 | C47 | C48 | 175.2(5) |
| N2 | C12 | C13 | C16 | -178.6(5) | N5 | C46 | C47 | C50 | -8.2(9)  |
| N2 | C15 | C24 | C25 | 139.5(6)  | N6 | C46 | C47 | C48 | -0.8(6)  |
| N2 | C15 | C24 | C29 | -40.5(8)  | N6 | C46 | C47 | C50 | 175.8(5) |

**Table 6 Torsion Angles for exp\_3226.**

| A   | B   | C   | D   | Angle/°   | A   | B   | C   | D   | Angle/°   |
|-----|-----|-----|-----|-----------|-----|-----|-----|-----|-----------|
| N3  | C12 | C13 | C14 | -175.7(5) | N6  | C49 | C54 | C55 | -143.1(5) |
| N3  | C12 | C13 | C16 | 3.7(9)    | N6  | C49 | C54 | C59 | 39.5(9)   |
| C1  | C2  | C3  | N1  | 3.3(6)    | C31 | C32 | C34 | N4  | 2.1(6)    |
| C1  | C2  | C3  | C5  | -174.3(5) | C31 | C32 | C34 | C35 | -176.3(4) |
| C2  | C1  | C4  | N1  | 4.0(6)    | C32 | C31 | C33 | N4  | 1.7(5)    |
| C2  | C1  | C4  | N3  | -175.9(5) | C32 | C31 | C33 | N5  | -173.7(5) |
| C2  | C1  | C23 | C20 | 126.0(7)  | C32 | C31 | C42 | C43 | 110.3(6)  |
| C2  | C1  | C23 | C21 | -115.3(6) | C32 | C31 | C42 | C44 | -130.3(6) |
| C2  | C1  | C23 | C22 | 0.7(8)    | C32 | C31 | C42 | C45 | -7.3(8)   |
| C2  | C3  | C5  | C6  | 134.4(5)  | C32 | C34 | C35 | C36 | 151.3(5)  |
| C2  | C3  | C5  | C10 | -40.0(7)  | C32 | C34 | C35 | C40 | -28.2(7)  |
| C3  | N1  | C4  | N3  | 177.9(5)  | C33 | N4  | C34 | C32 | -1.0(5)   |
| C3  | N1  | C4  | C1  | -2.0(5)   | C33 | N4  | C34 | C35 | 177.3(5)  |
| C3  | N1  | B1  | F1  | -49.6(7)  | C33 | N4  | B5  | F3  | -108.0(5) |
| C3  | N1  | B1  | F2  | 71.6(7)   | C33 | N4  | B5  | F4  | 131.0(4)  |
| C3  | N1  | B1  | N2  | -170.4(4) | C33 | N4  | B5  | N6  | 10.5(6)   |
| C3  | C5  | C6  | C7  | -177.5(4) | C33 | N5  | C46 | N6  | 1.2(7)    |
| C3  | C5  | C10 | C9  | 178.5(4)  | C33 | N5  | C46 | C47 | -174.2(5) |
| C4  | N1  | C3  | C2  | -0.7(5)   | C33 | C31 | C32 | C34 | -2.3(6)   |
| C4  | N1  | C3  | C5  | 176.8(5)  | C33 | C31 | C42 | C43 | -71.1(7)  |
| C4  | N1  | B1  | F1  | 120.0(5)  | C33 | C31 | C42 | C44 | 48.3(6)   |
| C4  | N1  | B1  | F2  | -118.8(5) | C33 | C31 | C42 | C45 | 171.3(5)  |
| C4  | N1  | B1  | N2  | -0.9(6)   | C34 | N4  | C33 | N5  | 175.2(5)  |
| C4  | N3  | C12 | N2  | -2.8(7)   | C34 | N4  | C33 | C31 | -0.4(5)   |
| C4  | N3  | C12 | C13 | 174.7(5)  | C34 | N4  | B5  | F3  | 72.6(6)   |
| C4  | C1  | C2  | C3  | -4.3(6)   | C34 | N4  | B5  | F4  | -48.4(7)  |
| C4  | C1  | C23 | C20 | -59.0(8)  | C34 | N4  | B5  | N6  | -168.9(5) |
| C4  | C1  | C23 | C21 | 59.8(7)   | C34 | C35 | C36 | C37 | 178.7(4)  |
| C4  | C1  | C23 | C22 | 175.8(6)  | C34 | C35 | C40 | C39 | -178.2(4) |
| C5  | C6  | C7  | C8  | 0.2(7)    | C35 | C36 | C37 | C38 | -0.8(7)   |
| C6  | C5  | C10 | C9  | 4.1(7)    | C36 | C35 | C40 | C39 | 2.2(7)    |
| C6  | C7  | C8  | S1  | -178.2(4) | C36 | C37 | C38 | S3  | -177.9(4) |
| C6  | C7  | C8  | C9  | 1.9(7)    | C36 | C37 | C38 | C39 | 2.8(7)    |
| C7  | C8  | C9  | C10 | -1.0(7)   | C37 | C38 | C39 | C40 | -2.3(7)   |
| C8  | C9  | C10 | C5  | -2.0(8)   | C38 | C39 | C40 | C35 | -0.2(7)   |
| C10 | C5  | C6  | C7  | -3.3(7)   | C40 | C35 | C36 | C37 | -1.7(7)   |
| C11 | S1  | C8  | C7  | 6.4(5)    | C41 | S3  | C38 | C37 | 3.9(5)    |
| C11 | S1  | C8  | C9  | -173.7(4) | C41 | S3  | C38 | C39 | -176.8(4) |

**Table 6 Torsion Angles for exp\_3226.**

| A      | B   | C   | D | Angle/°   | A   | B   | C   | D   | Angle/°   |
|--------|-----|-----|---|-----------|-----|-----|-----|-----|-----------|
| C12N2  | C15 | C14 |   | 1.6(5)    | C42 | C31 | C32 | C34 | 176.5(5)  |
| C12N2  | C15 | C24 |   | -178.5(5) | C42 | C31 | C33 | N4  | -177.2(4) |
| C12N2  | B1  | F1  |   | -123.9(5) | C42 | C31 | C33 | N5  | 7.4(8)    |
| C12N2  | B1  | F2  |   | 113.9(5)  | C46 | N5  | C33 | N4  | -2.5(7)   |
| C12N2  | B1  | N1  |   | -5.8(6)   | C46 | N5  | C33 | C31 | 172.3(5)  |
| C12N3  | C4  | N1  |   | -4.6(7)   | C46 | N6  | C49 | C48 | 0.1(5)    |
| C12N3  | C4  | C1  |   | 175.3(5)  | C46 | N6  | C49 | C54 | -177.9(5) |
| C12C13 | C14 | C15 |   | -1.1(6)   | C46 | N6  | B5  | F3  | 106.6(5)  |
| C12C13 | C16 | C17 |   | 176.0(6)  | C46 | N6  | B5  | F4  | -131.9(5) |
| C12C13 | C16 | C18 |   | 56.4(7)   | C46 | N6  | B5  | N4  | -11.7(6)  |
| C12C13 | C16 | C19 |   | -63.6(8)  | C46 | C47 | C48 | C49 | 0.8(6)    |
| C13C14 | C15 | N2  |   | -0.3(6)   | C46 | C47 | C50 | C51 | 172.7(5)  |
| C13C14 | C15 | C24 |   | 179.8(5)  | C46 | C47 | C50 | C52 | -67.5(7)  |
| C14C13 | C16 | C17 |   | -4.8(8)   | C46 | C47 | C50 | C53 | 53.0(7)   |
| C14C13 | C16 | C18 |   | -124.4(6) | C47 | C48 | C49 | N6  | -0.6(6)   |
| C14C13 | C16 | C19 |   | 115.6(6)  | C47 | C48 | C49 | C54 | 177.5(5)  |
| C14C15 | C24 | C25 |   | -40.6(7)  | C48 | C47 | C50 | C51 | -11.5(8)  |
| C14C15 | C24 | C29 |   | 139.4(6)  | C48 | C47 | C50 | C52 | 108.3(6)  |
| C15N2  | C12 | N3  |   | 175.5(5)  | C48 | C47 | C50 | C53 | -131.2(6) |
| C15N2  | C12 | C13 |   | -2.3(5)   | C48 | C49 | C54 | C55 | 39.2(8)   |
| C15N2  | B1  | F1  |   | 71.7(7)   | C48 | C49 | C54 | C59 | -138.2(6) |
| C15N2  | B1  | F2  |   | -50.6(7)  | C49 | N6  | C46 | N5  | -175.8(5) |
| C15N2  | B1  | N1  |   | -170.2(4) | C49 | N6  | C46 | C47 | 0.4(5)    |
| C15C24 | C25 | C26 |   | 178.8(5)  | C49 | N6  | B5  | F3  | -69.9(6)  |
| C15C24 | C29 | C28 |   | -178.5(5) | C49 | N6  | B5  | F4  | 51.6(7)   |
| C16C13 | C14 | C15 |   | 179.6(5)  | C49 | N6  | B5  | N4  | 171.8(5)  |
| C23C1  | C2  | C3  |   | 171.6(5)  | C49 | C54 | C55 | C56 | -178.3(6) |
| C23C1  | C4  | N1  |   | -171.9(5) | C49 | C54 | C59 | C58 | 178.1(6)  |
| C23C1  | C4  | N3  |   | 8.2(9)    | C50 | C47 | C48 | C49 | -175.7(5) |
| C24C25 | C26 | C27 |   | 1.1(9)    | C54 | C55 | C56 | C57 | -1.2(10)  |
| C25C24 | C29 | C28 |   | 1.6(7)    | C55 | C54 | C59 | C58 | 0.7(9)    |
| C25C26 | C27 | S2  |   | 179.6(4)  | C55 | C56 | C57 | S4  | -179.0(5) |
| C25C26 | C27 | C28 |   | -1.3(8)   | C55 | C56 | C57 | C58 | 3.2(9)    |
| C26C27 | C28 | C29 |   | 1.6(7)    | C56 | C57 | C58 | C59 | -3.4(9)   |
| C27C28 | C29 | C24 |   | -1.8(7)   | C57 | C58 | C59 | C54 | 1.5(9)    |
| C29C24 | C25 | C26 |   | -1.2(8)   | C59 | C54 | C55 | C56 | -0.8(9)   |
| C30S2  | C27 | C26 |   | 178.9(4)  | C60 | S4  | C57 | C56 | -172.1(5) |
| C30S2  | C27 | C28 |   | -0.2(5)   | C60 | S4  | C57 | C58 | 5.6(7)    |

**Table 6 Torsion Angles for exp\_3226.**

| A  | B  | C   | D   | Angle/°   | A  | B  | C   | D   | Angle/°   |
|----|----|-----|-----|-----------|----|----|-----|-----|-----------|
| B1 | N1 | C3  | C2  | 170.1(5)  | B5 | N4 | C33 | N5  | -4.4(7)   |
| B1 | N1 | C3  | C5  | -12.3(8)  | B5 | N4 | C33 | C31 | -180.0(4) |
| B1 | N1 | C4  | N3  | 6.3(7)    | B5 | N4 | C34 | C32 | 178.5(5)  |
| B1 | N1 | C4  | C1  | -173.6(4) | B5 | N4 | C34 | C35 | -3.2(8)   |
| B1 | N2 | C12 | N3  | 8.4(7)    | B5 | N6 | C46 | N5  | 7.0(7)    |
| B1 | N2 | C12 | C13 | -169.4(5) | B5 | N6 | C46 | C47 | -176.8(4) |
| B1 | N2 | C15 | C14 | 168.0(5)  | B5 | N6 | C49 | C48 | 177.0(5)  |
| B1 | N2 | C15 | C24 | -12.1(8)  | B5 | N6 | C49 | C54 | -1.0(9)   |

**Table 7 Hydrogen Atom Coordinates ( $\text{\AA} \times 10^4$ ) and Isotropic Displacement Parameters ( $\text{\AA}^2 \times 10^3$ ) for exp\_3226.**

| Atom | x       | y       | z       | U(eq) |
|------|---------|---------|---------|-------|
| H2   | 4972.26 | 3249.69 | -38.85  | 52    |
| H6   | 3315.59 | 3591.56 | 1891.97 | 50    |
| H7   | 2096.97 | 4681.34 | 2024.91 | 51    |
| H9   | 3676.56 | 5839.99 | 708.77  | 56    |
| H10  | 4893.7  | 4729.33 | 536.82  | 60    |
| H11A | 555.05  | 5568.8  | 1967.54 | 77    |
| H11B | 649.21  | 6542.79 | 2261.78 | 77    |
| H11C | 1691.12 | 6001.58 | 2615.1  | 77    |
| H14A | 8411.66 | 1756.02 | 3816.11 | 62    |
| H14B | 7132.74 | 1222.83 | 3683.93 | 62    |
| H17A | 9479.95 | 594.86  | 3496.49 | 132   |
| H17B | 9203.26 | -309.65 | 2998.87 | 132   |
| H17C | 8240.52 | 56.63   | 3445.21 | 132   |
| H18A | 8748.02 | 1010.31 | 1659.32 | 114   |
| H18B | 9538.76 | 289.4   | 1930.03 | 114   |
| H18C | 9770.72 | 1196.53 | 2423.13 | 114   |
| H19A | 6622.17 | -207.82 | 2254.11 | 99    |
| H19B | 7607.02 | -570.89 | 1824.24 | 99    |
| H19C | 6845.87 | 164.1   | 1557.13 | 99    |
| H20A | 7941.52 | 2188.48 | 51.6    | 166   |
| H20B | 7670.79 | 1260.12 | -396.57 | 166   |
| H20C | 7778.71 | 1444.72 | 479.7   | 166   |
| H21A | 5799.25 | 736.57  | 342.7   | 107   |
| H21B | 5701.03 | 497.56  | -530.36 | 107   |
| H21C | 4636.43 | 951.77  | -236.89 | 107   |



**Table 7 Hydrogen Atom Coordinates ( $\text{\AA}\times 10^4$ ) and Isotropic Displacement Parameters ( $\text{\AA}^2\times 10^3$ ) for exp\_3226.**

| Atom | x        | y       | z        | U(eq) |
|------|----------|---------|----------|-------|
| H22A | 4830.43  | 2114.71 | -930.84  | 138   |
| H22B | 5658.11  | 1470.86 | -1275.78 | 138   |
| H22C | 6180.21  | 2412.1  | -963.89  | 138   |
| H25  | 6257.08  | 1891.65 | 4596.77  | 64    |
| H26  | 5907.54  | 2620.85 | 5665.48  | 69    |
| H28  | 6721.6   | 4772.49 | 5046.72  | 55    |
| H29  | 7054.22  | 4024.51 | 3956.51  | 53    |
| H30A | 5727.47  | 5467.85 | 5827.71  | 96    |
| H30B | 7077.66  | 5469.3  | 6327.53  | 96    |
| H30C | 5973.22  | 5662.25 | 6713.97  | 96    |
| H32  | -351.42  | 3348.61 | -177.31  | 50    |
| H36  | -1600.59 | 3875.31 | 1980.2   | 47    |
| H37  | -2733.09 | 5006.23 | 2155.33  | 49    |
| H39  | -1828.37 | 5836.52 | 425.3    | 52    |
| H40  | -719.78  | 4693.28 | 241.88   | 52    |
| H41A | -4194.57 | 5876.13 | 2174.11  | 102   |
| H41B | -4163.71 | 6861.45 | 2338.81  | 102   |
| H41C | -2989.79 | 6415.11 | 2673.29  | 102   |
| H43A | 2790.91  | 1892.37 | 320.06   | 83    |
| H43B | 2590.63  | 2641.7  | -125.14  | 83    |
| H43C | 2648.55  | 1729.39 | -559.55  | 83    |
| H44A | -222.59  | 881.53  | -302.44  | 83    |
| H44B | 1072.99  | 873.04  | 257.68   | 83    |
| H44C | 931.74   | 621.14  | -618.75  | 83    |
| H45A | 608.35   | 1687.09 | -1420.05 | 85    |
| H45B | 631.48   | 2640.17 | -1062.71 | 85    |
| H45C | -517.88  | 2015.62 | -1106.42 | 85    |
| H48A | 3544.01  | 2074.85 | 3587.6   | 52    |
| H48B | 2445.99  | 1424.36 | 3588.67  | 52    |
| H51A | 4813.96  | 1006.42 | 3183.67  | 92    |
| H51B | 4618.32  | 66.11   | 2763.85  | 92    |
| H51C | 3794.03  | 387.8   | 3323.03  | 92    |
| H52A | 1885.68  | -84.31  | 2337.69  | 87    |
| H52B | 2696.62  | -436.03 | 1779.87  | 87    |
| H52C | 1711.74  | 199.03  | 1549.06  | 87    |
| H53A | 3333.93  | 1085.09 | 1289.43  | 89    |
| H53B | 4417.87  | 544.08  | 1585.68  | 89    |

**Table 7 Hydrogen Atom Coordinates ( $\text{\AA} \times 10^4$ ) and Isotropic Displacement Parameters ( $\text{\AA}^2 \times 10^3$ ) for exp\_3226.**

| Atom | x       | y       | z       | U(eq) |
|------|---------|---------|---------|-------|
| H53C | 4478.88 | 1501.74 | 1938.22 | 89    |
| H55  | 3447.56 | 3059.69 | 4600.32 | 53    |
| H56  | 3167.23 | 3778.82 | 5702.26 | 62    |
| H58  | -437.67 | 3761.42 | 4785.36 | 57    |
| H59  | -171.17 | 3041.57 | 3668.06 | 55    |
| H60A | -705.96 | 4786.67 | 5697.58 | 87    |
| H60B | -527.78 | 4809.93 | 6570.02 | 87    |
| H60C | -783.62 | 3944.31 | 6008.45 | 87    |

**Table 8 Solvent masks information for exp\_3226.**

| Number | X      | Y     | Z     | Volume | Electron count | Content |
|--------|--------|-------|-------|--------|----------------|---------|
| 1      | -0.583 | 0.000 | 0.500 | 726.2  | 170.8?         |         |

### Experimental

Single crystals of  $\text{C}_{30}\text{H}_{35}\text{BF}_2\text{N}_3\text{S}_2$  [exp\_3226] were [ ]. A suitable crystal was selected and [ ] on a **SuperNova, Dual, Cu at zero, AtlasS2** diffractometer. The crystal was kept at 149.99(10) K during data collection.
